# Supplementary material for: Synthesis of acyclic analogues of adenosine sulfonamides and their activity against RNA cap guanine N7-methyltransferase of SARS-CoV-2
Source: Royal Society of Chemistry journal article supplement (doi:10.1039/d4nj02481h), 2024-01-01
Supplement: d4nj02481h1.pdf [file d4nj02481h1.pdf]

## Supporting information

### Synthesis of acyclic analogues of adenosine sulfonamides and their activity against RNA cap guanine N7-Methyltransferase of SARS-CoV-2

Rostom Ahmed-Belkacem,<sup>a</sup> Adrien Delpal,<sup>b</sup> Bruno Canard,<sup>b</sup> Jean-Jacques Vasseur,<sup>a</sup> Etienne Decroly<sup>\*b</sup> and Françoise Debart<sup>\*a</sup>

#### Table of contents

|                                                                                                   |    |
|---------------------------------------------------------------------------------------------------|----|
| Modeling docking of acyclic nucleoside 15 within the cap-binding pocket of SARS-CoV-2 nsp14 ..... | 2  |
| Detailed synthetic procedures and spectral characterization data for compounds 1-19.....          | 2  |
| General information .....                                                                         | 2  |
| General method A for the synthesis of compounds 1 – 13.....                                       | 2  |
| General method B for the synthesis of compounds 14 – 17 .....                                     | 3  |
| General method C for the synthesis of compounds 18 and 19.....                                    | 3  |
| Synthesis of compounds 1 – 19.....                                                                | 3  |
| HPLC analysis of final compounds 1-19.....                                                        | 10 |
| <sup>1</sup> H-NMR and <sup>13</sup> C-NMR spectra of compounds 1-19.....                         | 17 |
| Expression and purification of recombinant protein .....                                          | 36 |
| Determination of the MTase activity by filter binding assay (FBA).....                            | 36 |

## Modeling docking of acyclic nucleoside **15** within the cap-binding pocket of SARS-CoV-2 nsp14

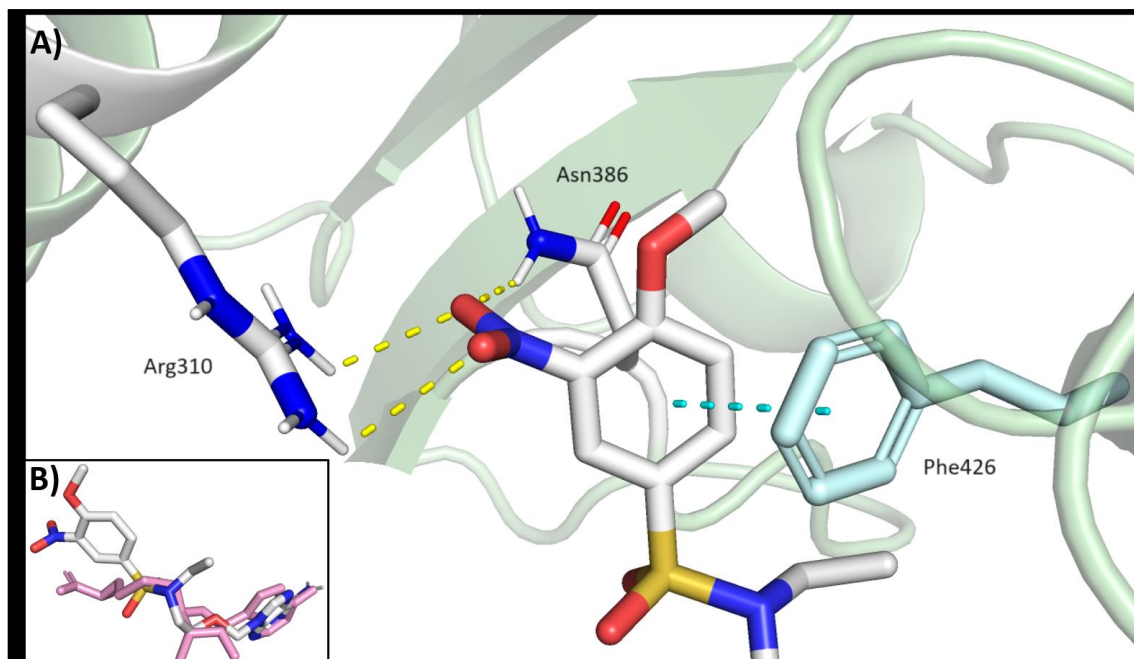

Modeling of the docking of acyclic nucleoside **15** within SARS-CoV-2 nsp14 (PDB ID: 7R2V, resolution 2.53 Å). **A)** the arylsulfonamide part of the compound is positioned in the cap-binding pocket of nsp14 and the  $\pi$ - $\pi$  stacking interaction with Phe426 is shown in cyan (4.6 Å). The hydrogen bonds formed between the *ortho*-nitro, *para*-methoxy substituents of the phenyl ring with Arg310 (2.5 Å, 2.6 Å) and Asn386 (2.3 Å) are shown in yellow. **B)** Superposition with **15** and co-crystallized SAH structure (in pink) is shown in bottom left.

## Detailed synthetic procedures and spectral characterization data for compounds **1-19**

### General information

All dry solvents and reagents were purchased from commercial suppliers and were used without further purification. Thin-layer chromatography (TLC) analyses were carried out on silica plate 60 F<sub>254</sub>. Purifications by column chromatography were performed using Biotage Isolera 1 system or Buchi C-815 system with Flash-Pure cartridges (Buchi). NMR experiments were recorded on Bruker 600 MHz spectrometers at 20°C. HRMS analyses were obtained with electrospray ionization (ESI) in positive mode on a Q-TOF Micromass spectrometer. Analytical HPLC was performed on a UHPLC ThermoScientific Ultimate 3000 system equipped with a LPG-3400RS pump, a DAD 3000 detector and an WPS-3000TBRS Autosampler, Column Oven TCC-3000SD. Final compounds **1-19** were stored at -20 °C for several months without any degradation.

### General method A for the synthesis of compounds **1 – 13**

To a solution at 0 °C under argon of **20** (50 mg, 0.24 mmol, 1.00 eq) or **24** (200 mg, 0.96 mmol, 1.00 eq) in anhydrous DMF (0.1 M) were successively added Et<sub>3</sub>N (2.00 eq) and the corresponding arylsulfonyl chloride reactant (1.25 eq) in three portions. After stirring at r.t for 3 hours, the reaction mixture was diluted with AcOEt and H<sub>2</sub>O. The aqueous layer was extracted with AcOEt and the combined organic extracts were washed with brine, dried over Na<sub>2</sub>SO<sub>4</sub> and concentrated under vacuum. The residue was purified by flash column chromatography (silica gel, linear gradient 0–6% MeOH in DCM). The fractions were collected, concentrated under vacuum and the resulting solid was resuspended in Et<sub>2</sub>O and filtered to give the desired compound as a colorless solid.

## General method B for the synthesis of compounds 14 – 17

A suspension of appropriate *N*-arylsulfonamide-containing acyclic nucleoside **10** – **13** (1.00 eq), ethyl *p*-toluenesulfonate (1.00 eq), KI (0.10 eq) and K<sub>2</sub>CO<sub>3</sub> (3.00 eq) in anhydrous DMF was stirred under argon at 50 °C for 16 hours. After cooling to room temperature, the reaction mixture was diluted with AcOEt and H<sub>2</sub>O. The aqueous layer was extracted with AcOEt and the combined organic extracts were washed with brine, dried over Na<sub>2</sub>SO<sub>4</sub> and concentrated under vacuum. The residue was purified by flash column chromatography (silica gel, linear gradient 0–6% MeOH in DCM). The fractions were collected, concentrated under vacuum and the resulting solid was resuspended in Et<sub>2</sub>O and filtered to give the desired compound as a colorless solid.

## General method C for the synthesis of compounds 18 and 19

To a solution at room temperature under argon of intermediate **24** (1.0 eq) in 1,4-dioxane (C = 0.02 M) were successively added the suitable propargyl reagent (1.4 eq) and a freshly pre-mixed solution of CuSO<sub>4</sub> (0.4 eq, C = 0.06 M) and sodium ascorbate (1.0 eq, C = 0.2 M) in water. After stirring at room temperature for 2 hours, solvents were removed under reduced pressure and the residue was co-evaporated twice with acetonitrile. Then, the residue was re-suspended in a mixture of dichloromethane and methanol (1/1, v : v) and filtered to remove the salts. Silica was added and solvents were removed under vacuum. The residue was purified by flash column chromatography (dry sample, silica gel, linear gradient 0–5% MeOH in DCM). The fractions were collected, concentrated under vacuum and the resulting solid was resuspended in Et<sub>2</sub>O and filtered to give the desired compound as a colorless solid.

## Synthesis of compounds 1 – 19

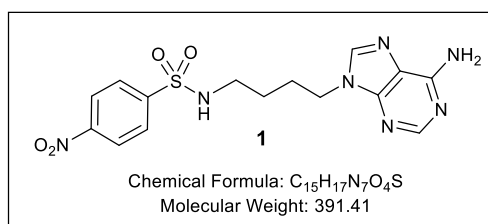

*N*-[4-(6-amino-9*H*-purin-9-yl)butyl]-4-nitrobenzene-1-sulfonamide (**1**). Following **method A** with 4-nitrobenzenesulfonyl chloride, **1** was obtained as a white solid (74 mg, 78%). R<sub>f</sub> 0.48 (98:2 DCM/MeOH). **<sup>1</sup>H-NMR** (600 MHz, DMSO-*d*<sub>6</sub>) δ 8.44 – 8.36 (m, 2H, 2 H<sub>Ar</sub>) ; 8.09 (d, J = 13.1 Hz, 2H, 2 H<sub>Ar</sub>) ; 8.10 (s, 1H, H<sub>8</sub>) ; 8.08 (s, 1H, H<sub>2</sub>) ; 8.04 – 7.96 (m, 3H, 2 H<sub>Ar</sub>, NH) ; 7.17 (s, 2H, NH<sub>2</sub>) ; 4.08 (t, J = 6.9 Hz, 2H, CH<sub>2</sub>) ; 2.82 (t, J = 7.0 Hz, 2H, CH<sub>2</sub>) ; 1.82 – 1.70 (m, 2H, CH<sub>2</sub>) ; 1.33 (dq, J = 10.0 Hz, 7.1 Hz, 2H, CH<sub>2</sub>). **<sup>13</sup>C-NMR** (150 MHz, DMSO-*d*<sub>6</sub>) δ 155.9 (C<sub>6</sub>) ; 152.3 (C<sub>2</sub>) ; 149.5 (C<sub>4</sub>, C<sub>q</sub> Ar) ; 146.2 (C<sub>q</sub> Ar) ; 140.7 (C<sub>8</sub>) ; 128.0 (2 CH<sub>Ar</sub>) ; 124.6 (2 CH<sub>Ar</sub>) ; 118.7 (C<sub>5</sub>) ; 42.3 (CH<sub>2</sub>) ; 42.0 (CH<sub>2</sub>) ; 26.6 (CH<sub>2</sub>) ; 26.3 (CH<sub>2</sub>). **HRMS** (ESI<sup>+</sup>): m/z calc. for C<sub>15</sub>H<sub>18</sub>N<sub>7</sub>O<sub>4</sub>S [M+H]<sup>+</sup>: 392.1135, Found 392.1140.

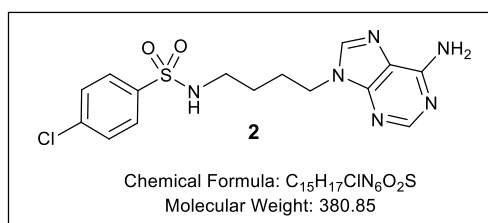

*N*-[4-(6-amino-9*H*-purin-9-yl)butyl]-4-chlorobenzene-1-sulfonamide (**2**). Following **method A** with 4-chlorobenzenesulfonyl chloride, **2** was obtained as a white solid (74 mg, 81%). R<sub>f</sub> 0.54 (98:2 DCM/MeOH). **<sup>1</sup>H-NMR** (600 MHz, DMSO-*d*<sub>6</sub>) δ 8.12 (s, 1H, H<sub>8</sub>) ; 8.09 (s, 1H, H<sub>2</sub>) ; 7.78 – 7.73 (m, 2H, 2 H<sub>Ar</sub>) ; 7.70 (br. s, 1H, NH) ; 7.68 – 7.62 (m, 2H, 2 H<sub>Ar</sub>) ; 7.17 (br. s, 2H, NH<sub>2</sub>) ; 4.08 (t, J = 6.9 Hz, 2H, CH<sub>2</sub>) ; 2.81 – 2.68 (m, 2H, CH<sub>2</sub>) ; 1.83 – 1.70 (m,

2H, CH<sub>2</sub>); 1.38 – 1.27 (m, 2H, CH<sub>2</sub>). **<sup>13</sup>C-NMR** (150 MHz, DMSO-*d*<sub>6</sub>) δ 155.9 (C<sub>6</sub>); 152.3 (C<sub>2</sub>); 149.5 (C<sub>4</sub>); 140.7 (C<sub>8</sub>); 139.4 (C<sub>q Ar</sub>); 137.2 (C<sub>q Ar</sub>); 129.3 (2 CH<sub>Ar</sub>); 128.4 (2 CH<sub>Ar</sub>); 118.7 (C<sub>5</sub>); 42.3 (CH<sub>2</sub>); 42.0 (CH<sub>2</sub>); 26.6 (CH<sub>2</sub>); 26.2 (CH<sub>2</sub>). **HRMS** (ESI+): m/z calc. for C<sub>15</sub>H<sub>18</sub>ClN<sub>6</sub>O<sub>2</sub>S [M+H]<sup>+</sup>: 381.0895, Found 381.0899.

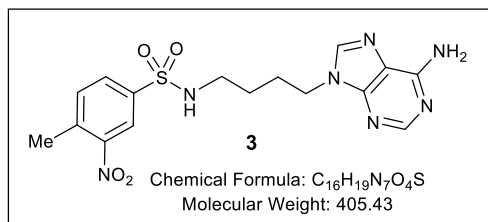

*N*-[4-(6-amino-9H-purin-9-yl)butyl]-4-methyl-3-nitrobenzene-1-sulfonamide (**3**). Following **method A** with 4-methyl-3-nitrobenzenesulfonyl chloride, **3** was obtained as a white solid (77 mg, 78%). R<sub>f</sub> 0.54 (98:2 DCM/MeOH). **<sup>1</sup>H-NMR** (600 MHz, DMSO-*d*<sub>6</sub>) δ 8.29 (d, J = 2.0 Hz, 1H, H<sub>Ar</sub>); 8.10 (s, 1H, H<sub>8</sub>); 8.08 (s, 1H, H<sub>2</sub>); 7.95 (dd, J = 8.1 Hz, 2.0 Hz, 1H, H<sub>Ar</sub>); 7.86 (t, J = 5.7 Hz, 1H, NH); 7.70 (d, J = 8.0 Hz, 1H, H<sub>Ar</sub>); 7.17 (br. s, 2H, NH<sub>2</sub>); 4.08 (t, J = 7.0 Hz, 2H, CH<sub>2</sub>); 2.80 (t, J = 6.7 Hz, 2H, CH<sub>2</sub>); 2.58 (s, 3H, CH<sub>3</sub>); 1.76 (dq, J = 9.8 Hz, 7.0 Hz, 2H, CH<sub>2</sub>); 1.38 – 1.27 (m, 2H, CH<sub>2</sub>). **<sup>13</sup>C-NMR** (150 MHz, DMSO-*d*<sub>6</sub>) δ 155.9 (C<sub>6</sub>); 152.3 (C<sub>2</sub>); 149.5 (C<sub>4</sub>); 148.7 (C<sub>q Ar</sub>); 140.7 (C<sub>8</sub>); 139.6 (C<sub>q Ar</sub>); 137.5 (C<sub>q Ar</sub>); 134.1 (CH<sub>Ar</sub>); 130.5 (CH<sub>Ar</sub>); 122.5 (CH<sub>Ar</sub>); 118.7 (C<sub>5</sub>); 117.8 (C<sub>q Ar</sub>); 42.3 (CH<sub>2</sub>); 42.0 (CH<sub>2</sub>); 26.6 (CH<sub>2</sub>); 26.2 (CH<sub>2</sub>); 19.8 (CH<sub>3</sub>). **HRMS** (ESI+): m/z calc. for C<sub>16</sub>H<sub>20</sub>N<sub>7</sub>O<sub>4</sub>S [M+H]<sup>+</sup>: 406.1292, Found 406.1291.

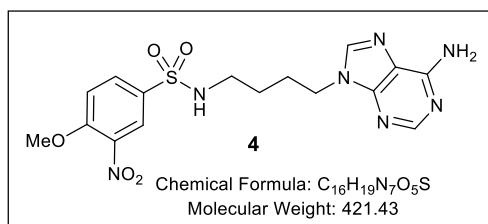

*N*-[4-(6-amino-9H-purin-9-yl)butyl]-4-methoxy-3-nitrobenzene-1-sulfonamide (**4**). Following **method A** with 4-methoxy-3-nitrobenzenesulfonyl chloride, **4** was obtained as a white solid (82 mg, 80%). R<sub>f</sub> 0.40 (98:2 DCM/MeOH). **<sup>1</sup>H-NMR** (600 MHz, DMSO-*d*<sub>6</sub>) δ 8.23 (d, J = 2.4 Hz, 1H, H<sub>Ar</sub>); 8.11 (s, 1H, H<sub>8</sub>); 8.09 (s, 1H, H<sub>2</sub>); 7.99 (dd, J = 9.0 Hz, 2.3 Hz, 1H, H<sub>Ar</sub>); 7.73 (br. s, 1H, NH); 7.54 (d, J = 8.9 Hz, 1H, H<sub>Ar</sub>); 7.17 (br. s, 2H, NH<sub>2</sub>); 4.09 (t, J = 7.0 Hz, 2H, CH<sub>2</sub>); 4.01 (s, 3H, OMe); 2.78 (t, J = 7.0 Hz, 2H, CH<sub>2</sub>); 1.82 – 1.71 (m, 2H, CH<sub>2</sub>); 1.38 – 1.27 (m, 2H, CH<sub>2</sub>). **<sup>13</sup>C-NMR** (150 MHz, DMSO-*d*<sub>6</sub>) δ 155.9 (C<sub>6</sub>); 154.7 (C<sub>q Ar</sub>); 152.3 (C<sub>2</sub>); 149.5 (C<sub>4</sub>); 140.7 (C<sub>8</sub>); 138.5 (C<sub>q Ar</sub>); 132.5 (CH<sub>Ar</sub>); 132.3 (C<sub>q Ar</sub>); 123.8 (CH<sub>Ar</sub>); 118.7 (C<sub>5</sub>); 115.3 (C<sub>q Ar</sub>); 57.4 (OMe); 42.3 (CH<sub>2</sub>); 42.0 (CH<sub>2</sub>); 26.7 (CH<sub>2</sub>); 26.2 (CH<sub>2</sub>). **HRMS** (ESI+): m/z calc. for C<sub>16</sub>H<sub>20</sub>N<sub>7</sub>O<sub>5</sub>S [M+H]<sup>+</sup>: 422.1241, Found 422.1237.

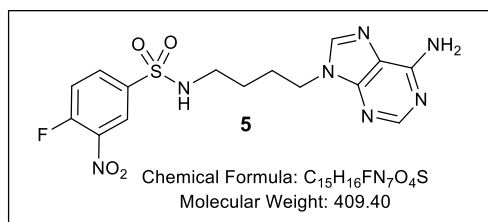

*N*-[4-(6-amino-9H-purin-9-yl)butyl]-4-fluoro-3-nitrobenzene-1-sulfonamide (**5**). Following **method A** with 4-fluoro-3-nitrobenzenesulfonyl chloride, **5** was obtained as a white solid (55 mg, 56%). R<sub>f</sub> 0.51 (98:2 DCM/MeOH). **<sup>1</sup>H-NMR** (600 MHz, DMSO-*d*<sub>6</sub>) δ 8.45 (dd, J = 6.9 Hz, 2.4 Hz, 1H, H<sub>Ar</sub>); 8.14 (ddd, J = 8.8 Hz, 3.9 Hz, 2.4 Hz, 1H, H<sub>Ar</sub>); 8.10 (s, 1H, H<sub>8</sub>); 8.08 (s, 1H, H<sub>2</sub>); 7.95 (t, J = 5.7 Hz, 1H, NH); 7.80 (dd, J = 10.9 Hz, 8.7 Hz, 1H, H<sub>Ar</sub>); 7.17 (br. s, 2H, NH<sub>2</sub>); 4.09 (t, J = 6.9 Hz, 2H, CH<sub>2</sub>); 2.81 (t, J = 6.7 Hz, 2H, CH<sub>2</sub>); 1.82 – 1.72 (m, 2H, CH<sub>2</sub>); 1.33 (dq, J = 9.7

Hz, 7.1 Hz, 2H, CH<sub>2</sub>). <sup>13</sup>C-NMR (150 MHz, DMSO-*d*<sub>6</sub>) δ 157.5, 155.7 (C-F) ; 155.9 (C<sub>6</sub>) ; 152.3 (C<sub>2</sub>) ; 149.5 (C<sub>4</sub>) ; 140.7 (C<sub>8</sub>) ; 137.5, 137.4 (C<sub>q Ar</sub>) ; 136.9, 136.9 (C<sub>q Ar</sub>) ; 134.2, 134.1 (CH<sub>Ar</sub>) ; 124.9 (CH<sub>Ar</sub>) ; 120.2, 120.0 (CH<sub>Ar</sub>) ; 118.7 (C<sub>5</sub>) ; 42.3 (CH<sub>2</sub>) ; 42.0 (CH<sub>2</sub>) ; 26.6 (CH<sub>2</sub>) ; 26.2 (CH<sub>2</sub>). HRMS (ESI+): m/z calc. for C<sub>15</sub>H<sub>17</sub>FN<sub>7</sub>O<sub>4</sub>S [M+H]<sup>+</sup>: 410.1041, Found 410.1039.

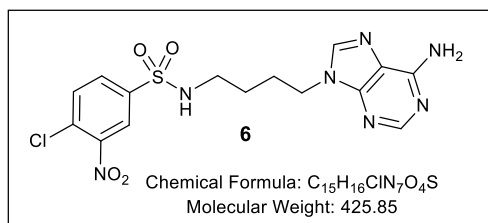

*N*-[4-(6-amino-9H-purin-9-yl)butyl]-4-chloro-3-nitrobenzene-1-sulfonamide (**6**). Following **method A** with 4-chloro-3-nitrobenzenesulfonyl chloride, **6** (61 mg, 63%) was obtained as a white solid. R<sub>f</sub> 0.47 (98:2 DCM/MeOH). <sup>1</sup>H-NMR (600 MHz, DMSO-*d*<sub>6</sub>) δ 8.41 (d, J = 2.1 Hz, 1H, H<sub>Ar</sub>) ; 8.11 (s, 1H, H<sub>8</sub>) ; 8.09 (s, 1H, H<sub>2</sub>) ; 8.04 – 7.96 (m, 3H, 2 H<sub>Ar</sub>, NH) ; 7.17 (br. s, 2H, NH<sub>2</sub>) ; 4.10 (t, J = 6.9 Hz, 2H, CH<sub>2</sub>) ; 2.83 (t, J = 7.0 Hz, 2H, CH<sub>2</sub>) ; 1.85 – 1.72 (m, 2H, CH<sub>2</sub>) ; 1.34 (dq, J = 10.0 Hz, 7.1 Hz, 2H, CH<sub>2</sub>). <sup>13</sup>C-NMR (150 MHz, DMSO-*d*<sub>6</sub>) δ 155.9 (C<sub>6</sub>) ; 152.3 (C<sub>2</sub>) ; 149.5 (C<sub>4</sub>) ; 147.4 (C<sub>q Ar</sub>) ; 140.7 (C<sub>8</sub>) ; 133.1 (CH<sub>Ar</sub>) ; 131.2 (CH<sub>Ar</sub>) ; 129.2 (C<sub>q Ar</sub>) ; 123.9 (C<sub>q Ar</sub>) ; 118.7 (C<sub>5</sub>) ; 42.3 (CH<sub>2</sub>) ; 42.0 (CH<sub>2</sub>) ; 26.6 (CH<sub>2</sub>) ; 26.2 (CH<sub>2</sub>). HRMS (ESI+): m/z calc. for C<sub>15</sub>H<sub>17</sub>ClN<sub>7</sub>O<sub>4</sub>S [M+H]<sup>+</sup>: 426.0746, Found 426.0742.

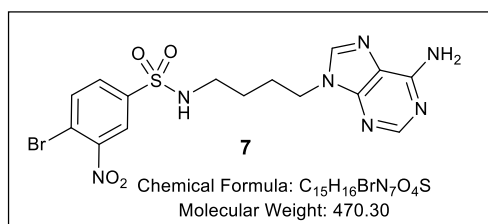

*N*-[4-(6-amino-9H-purin-9-yl)butyl]-4-bromo-3-nitrobenzene-1-sulfonamide (**7**). Following **method A** with 4-bromo-3-nitrobenzenesulfonyl chloride, **7** (71 mg, 62%) was obtained as a white solid. R<sub>f</sub> 0.47 (98:2 DCM/MeOH). <sup>1</sup>H-NMR (600 MHz, DMSO-*d*<sub>6</sub>) δ 8.36 (d, J = 2.1 Hz, 1H, H<sub>Ar</sub>) ; 8.11 (s, 1H, H<sub>8</sub>) ; 8.09 (s, 1H, H<sub>2</sub>) ; 8.14 (d, J = 8.5 Hz, 1H, H<sub>Ar</sub>) ; 7.97 (t, J = 5.8 Hz, 1H, NH) ; 7.91 (dd, J = 8.4 Hz, 2.2 Hz, 1H, H<sub>Ar</sub>) ; 7.17 (br. s, 2H, NH<sub>2</sub>) ; 4.10 (t, J = 6.9 Hz, 2H, CH<sub>2</sub>) ; 2.83 (t, J = 6.7 Hz, 2H, CH<sub>2</sub>) ; 1.78 (dq, J = 9.7 Hz, 7.1 Hz, 2H, CH<sub>2</sub>) ; 1.40 – 1.29 (m, 2H, CH<sub>2</sub>). <sup>13</sup>C-NMR (150 MHz, DMSO-*d*<sub>6</sub>) δ 155.9 (C<sub>6</sub>) ; 152.3 (C<sub>2</sub>) ; 149.6 (C<sub>q Ar</sub>) ; 149.5 (C<sub>4</sub>) ; 141.3 (C<sub>q Ar</sub>) ; 140.7 (C<sub>8</sub>) ; 136.2 (CH<sub>Ar</sub>) ; 131.0 (CH<sub>Ar</sub>) ; 123.5 (CH<sub>Ar</sub>) ; 118.7 (C<sub>5</sub>) ; 117.8 (C<sub>q Ar</sub>) ; 42.3 (CH<sub>2</sub>) ; 42.0 (CH<sub>2</sub>) ; 26.6 (CH<sub>2</sub>) ; 26.3 (CH<sub>2</sub>). HRMS (ESI+): m/z calc. for C<sub>15</sub>H<sub>17</sub>BrN<sub>7</sub>O<sub>4</sub>S [M+H]<sup>+</sup>: 470.0240, Found 470.0236.

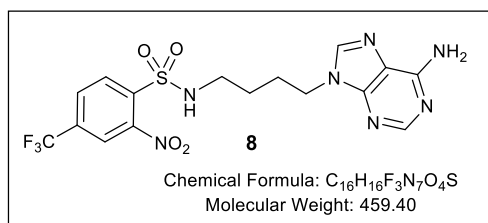

*N*-[4-(6-amino-9H-purin-9-yl)butyl]-2-nitro-4-trifluoromethylbenzene-1-sulfonamide (**8**). Following **method A** with 2-nitro-4-trifluoromethylbenzenesulfonyl chloride, **8** (38 mg, 34%) was obtained as a white solid. R<sub>f</sub> 0.47 (98:2 DCM/MeOH). <sup>1</sup>H-NMR (600 MHz, DMSO-*d*<sub>6</sub>) δ 8.54 (d, J = 1.7 Hz, 1H, H<sub>Ar</sub>) ; 8.39 (br. s, 1H, NH) ; 8.26 (dd, J = 8.3 Hz, 1.8 Hz, 1H, H<sub>Ar</sub>) ; 8.17 (d, J = 8.3 Hz, 1H, H<sub>Ar</sub>) ; 8.11 (s, 1H, H<sub>8</sub>) ; 8.09 (s, 1H, H<sub>2</sub>) ; 7.18 (br. s, 2H, NH<sub>2</sub>) ; 4.10 (t, J = 6.9 Hz, 2H, CH<sub>2</sub>) ; 2.95 (t, J = 7.0 Hz, 2H, CH<sub>2</sub>) ; 1.79 (dq, J = 9.7 Hz, 7.1 Hz, 2H, CH<sub>2</sub>) ; 1.39 (dq, J = 10.0 Hz,

7.2 Hz, 2H, CH<sub>2</sub>). <sup>13</sup>C-NMR (150 MHz, DMSO-*d*<sub>6</sub>) δ 155.9 (C<sub>6</sub>) ; 152.3 (C<sub>2</sub>) ; 149.5 (C<sub>4</sub>) ; 147.8 (C<sub>q Ar</sub>) ; 140.7 (C<sub>8</sub>) ; 136.4 (C<sub>q Ar</sub>) ; 133.7, 133.5, 133.2, 133.0 (C-CF<sub>3</sub>) ; 130.8 (CH<sub>Ar</sub>) ; 129.6, 129.6 (CH<sub>Ar</sub>) ; 125.1, 123.2, 121.4, 119.6 (CF<sub>3</sub>) ; 122.0 (CH<sub>Ar</sub>) ; 118.7 (C<sub>5</sub>) ; 57.4 (OMe) ; 42.3 (CH<sub>2</sub>) ; 42.2 (CH<sub>2</sub>) ; 26.6 (CH<sub>2</sub>) ; 26.3 (CH<sub>2</sub>). HRMS (ESI<sup>+</sup>): m/z calc. for C<sub>16</sub>H<sub>17</sub>F<sub>3</sub>N<sub>7</sub>O<sub>4</sub>S [M+H]<sup>+</sup>: 460.1009, Found 460.1006.

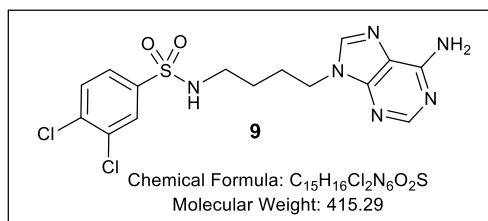

*N*-[4-(6-amino-9H-purin-9-yl)butyl]-3,4-dichlorobenzene-1-sulfonamide (**9**). Following **method A** with 3,4-dichlorobenzenesulfonyl chloride, **9** (70 mg, 70%) was obtained as a white solid. Rf 0.59 (98:2 DCM/MeOH). <sup>1</sup>H-NMR (600 MHz, DMSO-*d*<sub>6</sub>) 8.11 (s, 1H, H<sub>8</sub>) ; 8.09 (s, 1H, H<sub>2</sub>) ; 7.94 (d, J = 2.2 Hz, 1H, H<sub>Ar</sub>) ; 7.86 (d, J = 8.4 Hz, 1H, H<sub>Ar</sub>) ; 7.82 (t, J = 5.9 Hz, 1H, NH) ; 7.71 (dd, J = 8.4, 2.2 Hz, 1H, H<sub>Ar</sub>) ; 7.17 (br. s, 2H, NH<sub>2</sub>) ; 4.09 (t, J = 7.0 Hz, 2H, CH<sub>2</sub>) ; 2.79 (q, J = 6.7 Hz, 2H, CH<sub>2</sub>) ; 1.83 – 1.72 (m, 2H, CH<sub>2</sub>) ; 1.38 – 1.29 (m, 2H, CH<sub>2</sub>). <sup>13</sup>C-NMR (150 MHz, DMSO-*d*<sub>6</sub>) δ 156.0 (C<sub>6</sub>) ; 152.3 (C<sub>2</sub>) ; 149.5 (C<sub>4</sub>, C<sub>q Ar</sub>) ; 140.9 (C<sub>q Ar</sub>) ; 140.7 (C<sub>8</sub>) ; 135.4 (C<sub>q Ar</sub>) ; 132.1 (C<sub>q Ar</sub>) ; 131.7 (CH<sub>Ar</sub>) ; 128.2 (CH<sub>Ar</sub>) ; 126.6 (CH<sub>Ar</sub>) ; 118.7 (C<sub>5</sub>) ; 42.3 (CH<sub>2</sub>) ; 42.0 (CH<sub>2</sub>) ; 26.6 (CH<sub>2</sub>) ; 26.2 (CH<sub>2</sub>). HRMS (ESI<sup>+</sup>): m/z calc. for C<sub>15</sub>H<sub>17</sub>Cl<sub>2</sub>N<sub>6</sub>O<sub>2</sub>S [M+H]<sup>+</sup>: 415.0505, Found 415.0504.

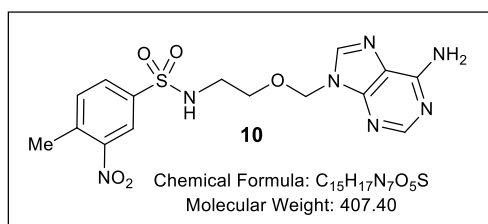

*N*-{2-[(6-amino-9H-purin-9-yl)methoxy]ethyl}-4-methyl-3-nitrobenzene-1-sulfonamide (**10**). Following **method A** with 4-methyl-3-nitrobenzenesulfonyl chloride, **10** (289 mg, 74%) was obtained as a white solid. Rf 0.47 (98:2 DCM/MeOH). <sup>1</sup>H-NMR (600 MHz, DMSO-*d*<sub>6</sub>) δ 8.31 (d, J = 2.0 Hz, 1H, H<sub>Ar</sub>) ; 8.20 (s, 1H, H<sub>8</sub>) ; 8.14 (s, 1H, H<sub>2</sub>) ; 8.04 (br. s, 1H, NH) ; 7.94 (dd, J = 8.0 Hz, 2.0 Hz, 1H, H<sub>Ar</sub>) ; 7.68 (dd, J = 8.0 Hz, 0.9 Hz, 1H, H<sub>Ar</sub>) ; 7.28 (br. s, 2H, NH<sub>2</sub>) ; 5.45 (s, 2H, CH<sub>2</sub>) ; 3.46 (t, J = 5.6 Hz, 2H, CH<sub>2</sub>) ; 2.96 (t, J = 5.5 Hz, 2H, CH<sub>2</sub>) ; 2.59 (s, 3H, CH<sub>3</sub>). <sup>13</sup>C-NMR (150 MHz, DMSO-*d*<sub>6</sub>) δ 156.0 (C<sub>6</sub>) ; 152.9 (C<sub>2</sub>) ; 149.7 (C<sub>4</sub>) ; 148.6 (C<sub>q Ar</sub>) ; 141.0 (C<sub>8</sub>) ; 139.7 (C<sub>q Ar</sub>) ; 137.5 (C<sub>q Ar</sub>) ; 134.0 (CH<sub>Ar</sub>) ; 130.5 (CH<sub>Ar</sub>) ; 122.6 (CH<sub>Ar</sub>) ; 118.4 (C<sub>5</sub>) ; 71.9 (CH<sub>2</sub>) ; 67.5 (CH<sub>2</sub>) ; 42.1 (CH<sub>2</sub>) ; 19.7 (CH<sub>3</sub>). HRMS (ESI<sup>+</sup>): m/z calc. for C<sub>15</sub>H<sub>18</sub>N<sub>7</sub>O<sub>5</sub>S [M+H]<sup>+</sup>: 408.1085, Found 408.1086.

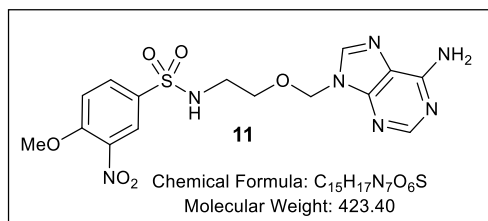

*N*-{2-[(6-amino-9H-purin-9-yl)methoxy]ethyl}-4-methoxy-3-nitrobenzene-1-sulfonamide (**11**). Following **method A** with 4-methoxy-3-nitrobenzenesulfonyl chloride, **11** (280 mg, 69%) was obtained as a white solid. Rf 0.40 (98:2 DCM/MeOH). <sup>1</sup>H-NMR (600 MHz, DMSO-*d*<sub>6</sub>) δ 8.24 (d, J = 2.3 Hz, 1H, H<sub>Ar</sub>) ; 8.21 (s, 1H, H<sub>8</sub>) ; 8.14 (s, 1H, H<sub>2</sub>) ; 7.99 (dd, J = 8.9 Hz, 2.4 Hz, 1H, H<sub>Ar</sub>) ; 7.90 (br. s, 1H, NH) ; 7.52 (d, J = 9.0 Hz, 1H, H<sub>Ar</sub>) ; 7.28 (br. s, 2H, NH<sub>2</sub>) ; 5.47 (s,

2H, CH<sub>2</sub>); 4.01 (s, 3H, OMe); 3.47 (t, J = 5.6 Hz, 2H, CH<sub>2</sub>); 2.96 – 2.90 (m, 2H, CH<sub>2</sub>). <sup>13</sup>C-NMR (150 MHz, DMSO-*d*<sub>6</sub>) δ 156.0 (C<sub>6</sub>); 154.6 (C<sub>q Ar</sub>); 152.9 (C<sub>2</sub>); 149.5 (C<sub>4</sub>); 141.1 (C<sub>8</sub>); 138.5 (C<sub>q Ar</sub>); 132.5 (CH<sub>Ar</sub>); 132.3 (C<sub>q Ar</sub>); 132.8 (CH<sub>Ar</sub>); 118.4 (C<sub>5</sub>); 115.2 (CH<sub>Ar</sub>); 71.9 (CH<sub>2</sub>); 67.6 (CH<sub>2</sub>); 57.4 (OMe); 42.1 (CH<sub>2</sub>). HRMS (ESI<sup>+</sup>): m/z calc. for C<sub>15</sub>H<sub>18</sub>N<sub>7</sub>O<sub>6</sub>S [M+H]<sup>+</sup>: 424.1034, Found 424.1033.

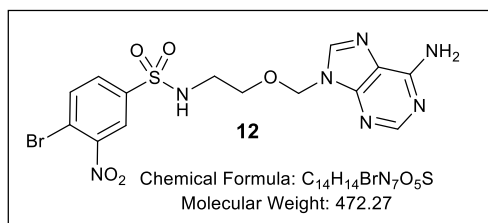

*N*-{2-[(6-amino-9H-purin-9-yl)methoxy]ethyl}-4-bromo-3-nitrobenzene-1-sulfonamide (**12**). Following **method A** with 4-bromo-3-nitrobenzenesulfonyl chloride, **12** (277 mg, 61%) was obtained as a white solid. Rf 0.47 (98:2 DCM/MeOH). <sup>1</sup>H-NMR (600 MHz, DMSO-*d*<sub>6</sub>) δ 8.37 (d, J = 2.1 Hz, 1H, H<sub>Ar</sub>); 8.21 (s, 1H, H<sub>8</sub>); 8.14 (m, 2H, H<sub>2</sub>, H<sub>Ar</sub>); 7.91 (dd, J = 8.4 Hz, 2.2 Hz, 1H, H<sub>Ar</sub>); 7.90 (br. s, 1H, NH); 7.28 (br. s, 2H, NH<sub>2</sub>); 5.46 (s, 2H, CH<sub>2</sub>); 3.47 (t, J = 5.5 Hz, 2H, CH<sub>2</sub>); 3.00 (q, J = 5.5 Hz, 2H, CH<sub>2</sub>). <sup>13</sup>C-NMR (150 MHz, DMSO-*d*<sub>6</sub>) δ 156.0 (C<sub>6</sub>); 152.9 (C<sub>2</sub>); 149.7 (C<sub>q Ar</sub>); 149.5 (C<sub>4</sub>); 141.4 (C<sub>q Ar</sub>); 141.1 (C<sub>8</sub>); 136.1 (CH<sub>Ar</sub>); 131.0 (CH<sub>Ar</sub>); 123.6 (CH<sub>Ar</sub>); 118.4 (C<sub>5</sub>); 117.8 (C<sub>q Ar</sub>); 71.9 (CH<sub>2</sub>); 67.6 (CH<sub>2</sub>); 42.2 (CH<sub>2</sub>). HRMS (ESI<sup>+</sup>): m/z calc. for C<sub>14</sub>H<sub>15</sub>BrN<sub>7</sub>O<sub>5</sub>S [M+H]<sup>+</sup>: 472.0033, Found 472.0033.

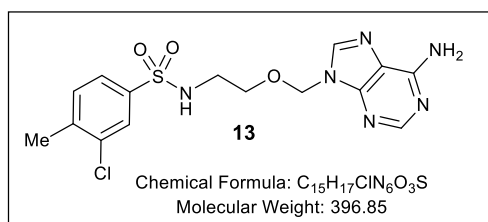

*N*-{2-[(6-amino-9H-purin-9-yl)methoxy]ethyl}-3-chloro-4-methylbenzene-1-sulfonamide (**13**). Following **method A** with 3-chloro-4-methylbenzenesulfonyl chloride, **13** (274 mg, 72%) was obtained as a white solid. Rf 0.52 (98:2 DCM/MeOH). <sup>1</sup>H-NMR (600 MHz, DMSO-*d*<sub>6</sub>) δ 8.21 (s, 1H, H<sub>8</sub>); 8.15 (s, 1H, H<sub>2</sub>); 7.84 (br. s, 1H, NH); 7.74 (d, J = 1.8 Hz, 1H, H<sub>Ar</sub>); 7.59 (dd, J = 7.9 Hz, 1.9 Hz, 1H, H<sub>Ar</sub>); 7.52 (dd, J = 7.9 Hz, 0.9 Hz, 1H, H<sub>Ar</sub>); 7.29 (br. s, 2H, NH<sub>2</sub>); 5.47 (s, 2H, CH<sub>2</sub>); 3.46 (t, J = 5.6 Hz, 2H, CH<sub>2</sub>); 2.91 (t, J = 5.6 Hz, 2H, CH<sub>2</sub>); 2.39 (s, 3H, CH<sub>3</sub>). <sup>13</sup>C-NMR (150 MHz, DMSO-*d*<sub>6</sub>) δ 156.0 (C<sub>6</sub>); 152.9 (C<sub>2</sub>); 149.7 (C<sub>4</sub>); 141.0 (C<sub>8</sub>); 140.5 (C<sub>q Ar</sub>); 139.8 (C<sub>q Ar</sub>); 133.8 (C<sub>q Ar</sub>); 131.9 (CH<sub>Ar</sub>); 126.5 (CH<sub>Ar</sub>); 125.1 (CH<sub>Ar</sub>); 118.4 (C<sub>5</sub>); 71.9 (CH<sub>2</sub>); 67.6 (CH<sub>2</sub>); 42.1 (CH<sub>2</sub>); 19.7 (CH<sub>3</sub>). HRMS (ESI<sup>+</sup>): m/z calc. for C<sub>15</sub>H<sub>18</sub>ClN<sub>6</sub>O<sub>3</sub>S [M+H]<sup>+</sup>: 398.0844, Found 397.0847.

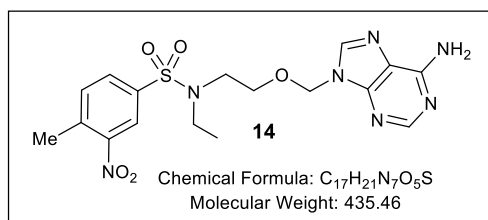

*N*-{2-[(6-amino-9H-purin-9-yl)methoxy]ethyl}-4-methyl-3-nitro-N-ethylbenzene-1-sulfonamide (**14**). Following **method B** with **10**, **14** (115 mg, 54%) was obtained as a white solid. Rf 0.52 (98:2 DCM/MeOH). <sup>1</sup>H-NMR (600 MHz, DMSO-*d*<sub>6</sub>) δ 8.27 (d, J = 2.0 Hz, 1H, H<sub>Ar</sub>); 8.21 (s, 1H, H<sub>8</sub>); 8.15 (s, 1H, H<sub>2</sub>); 7.96 (dd, J = 8.1 Hz, 2.0 Hz, 1H, H<sub>Ar</sub>); 7.66 (d, J = 8.3 Hz, 1H, H<sub>Ar</sub>); 7.29 (br. s, 2H, NH<sub>2</sub>); 5.49 (s, 2H, CH<sub>2</sub>); 3.61 (t, J = 5.6 Hz, 2H, CH<sub>2</sub>); 3.31 (m, 2H, CH<sub>2</sub>); 3.16 (q, J = 7.1 Hz, 2H, CH<sub>2</sub>-CH<sub>3</sub>); 2.58 (s, 3H, CH<sub>3</sub>); 0.97 (t, J = 7.1 Hz, 3H, CH<sub>3</sub>-CH<sub>2</sub>). <sup>13</sup>C-NMR (150 MHz,

DMSO-*d*<sub>6</sub> δ 156.0 (C<sub>6</sub>) ; 152.9 (C<sub>2</sub>) ; 149.7 (C<sub>4</sub>) ; 148.8 (C<sub>q Ar</sub>) ; 141.0 (C<sub>8</sub>) ; 138.5 (C<sub>q Ar</sub>) ; 137.6 (C<sub>q Ar</sub>) ; 134.1 (CH<sub>Ar</sub>) ; 130.7 (CH<sub>Ar</sub>) ; 122.8 (CH<sub>Ar</sub>) ; 118.5 (C<sub>5</sub>) ; 118.0 (C<sub>q Ar</sub>) ; 71.9 (CH<sub>2</sub>) ; 67.2 (CH<sub>2</sub>) ; 46.4 (CH<sub>2 Et</sub>) ; 43.0 (CH<sub>2</sub>) ; 19.5 (CH<sub>3</sub>) ; 13.9 (CH<sub>3 Et</sub>). **HRMS** (ESI+): *m/z* calc. for C<sub>17</sub>H<sub>22</sub>N<sub>7</sub>O<sub>5</sub>S [M+H]<sup>+</sup>: 436. 1398, Found 436.1400.

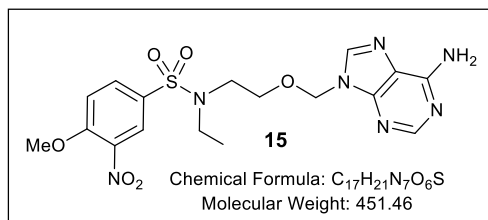

*N*-{2-[(6-amino-9H-purin-9-yl)methoxy]ethyl}-4-methoxy-3-nitro-*N*-ethylbenzene-1-sulfonamide (**15**). Following **method B** with **11**, **15** (113 mg, 53%) was obtained as a white solid. *R*<sub>f</sub> 0.52 (98:2 DCM/MeOH). <sup>1</sup>H-NMR (600 MHz, DMSO-*d*<sub>6</sub>) δ 8.26 (d, *J* = 2.4 Hz, 1H, H<sub>Ar</sub>) ; 8.23 (s, 1H, H<sub>8</sub>) ; 8.16 (s, 1H, H<sub>2</sub>) ; 8.00 (dd, *J* = 8.8 Hz, 2.4 Hz, 1H, H<sub>Ar</sub>) ; 7.48 (d, *J* = 9.0 Hz, 1H, H<sub>Ar</sub>) ; 7.29 (br. s, 2H, NH<sub>2</sub>) ; 5.51 (s, 2H, CH<sub>2</sub>) ; 4.01 (s, 3H, OMe) ; 3.61 (t, *J* = 5.7 Hz, 2H, CH<sub>2</sub>) ; 3.28 (t, *J* = 5.5 Hz, 2H, CH<sub>2</sub>) ; 3.14 (q, *J* = 7.1 Hz, 2H, CH<sub>2</sub>-CH<sub>3</sub>) ; 0.96 (t, *J* = 7.1 Hz, 3H, CH<sub>3</sub>-CH<sub>2</sub>). <sup>13</sup>C-NMR (150 MHz, DMSO-*d*<sub>6</sub>) δ 156.0 (C<sub>6</sub>) ; 154.6 (C<sub>q Ar</sub>) ; 152.9 (C<sub>2</sub>) ; 149.7 (C<sub>4</sub>) ; 141.1 (C<sub>8</sub>) ; 138.8 (C<sub>q Ar</sub>) ; 132.6 (CH<sub>Ar</sub>) ; 131.2 (C<sub>q Ar</sub>) ; 124.0 (CH<sub>Ar</sub>) ; 118.5 (C<sub>5</sub>) ; 115.2 (CH<sub>Ar</sub>) ; 71.9 (CH<sub>2</sub>) ; 67.3 (CH<sub>2</sub>) ; 57.4 (OMe) ; 46.4 (CH<sub>2 Et</sub>) ; 43.1 (CH<sub>2</sub>) ; 13.9 (CH<sub>3 Et</sub>). **HRMS** (ESI+): *m/z* calc. for C<sub>17</sub>H<sub>22</sub>N<sub>7</sub>O<sub>6</sub>S [M+H]<sup>+</sup>: 452. 1347, Found 452.1346.

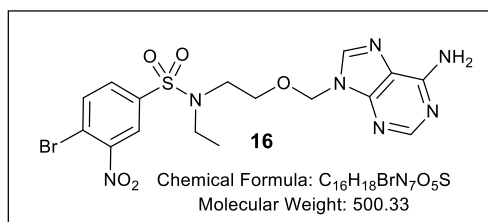

*N*-{2-[(6-amino-9H-purin-9-yl)methoxy]ethyl}-4-bromo-3-nitro-*N*-ethylbenzene-1-sulfonamide (**16**). Following **method B** with **12**, **16** (100 mg, 47%) was obtained as a white solid. *R*<sub>f</sub> 0.50 (98:2 DCM/MeOH). <sup>1</sup>H-NMR (600 MHz, DMSO-*d*<sub>6</sub>) δ 8.42 (d, *J* = 2.2 Hz, 1H, H<sub>Ar</sub>) ; 8.23 (s, 1H, H<sub>8</sub>) ; 8.16 (s, 1H, H<sub>2</sub>) ; 8.10 (d, *J* = 8.5 Hz, 1H, H<sub>Ar</sub>) ; 7.94 (dd, *J* = 8.4 Hz, 2.3 Hz, 1H, H<sub>Ar</sub>) ; 7.29 (br. s, 2H, NH<sub>2</sub>) ; 5.50 (s, 2H, CH<sub>2</sub>) ; 3.61 (t, *J* = 5.6 Hz, 2H, CH<sub>2</sub>) ; 3.31 (m, 2H, CH<sub>2</sub>) ; 3.17 (q, *J* = 7.1 Hz, 2H, CH<sub>2</sub>-CH<sub>3</sub>) ; 2.91 (t, *J* = 5.6 Hz, 2H, CH<sub>2</sub>) ; 0.97 (t, *J* = 7.1 Hz, 3H, CH<sub>3</sub>-CH<sub>2</sub>). <sup>13</sup>C-NMR (150 MHz, DMSO-*d*<sub>6</sub>) δ 156.0 (C<sub>6</sub>) ; 152.9 (C<sub>2</sub>) ; 149.9 (C<sub>q Ar</sub>) ; 149.7 (C<sub>4</sub>) ; 141.0 (C<sub>8</sub>) ; 140.2 (C<sub>q Ar</sub>) ; 136.0 (CH<sub>Ar</sub>) ; 131.2 (CH<sub>Ar</sub>) ; 123.8 (CH<sub>Ar</sub>) ; 118.5 (C<sub>5</sub>) ; 118.0 (C<sub>q Ar</sub>) ; 71.9 (CH<sub>2</sub>) ; 67.1 (CH<sub>2</sub>) ; 46.6 (CH<sub>2 Et</sub>) ; 43.1 (CH<sub>2</sub>) ; 13.9 (CH<sub>3 Et</sub>). **HRMS** (ESI+): *m/z* calc. for C<sub>16</sub>H<sub>19</sub>BrN<sub>7</sub>O<sub>5</sub>S [M+H]<sup>+</sup>: 500. 0346, Found 500.0345.

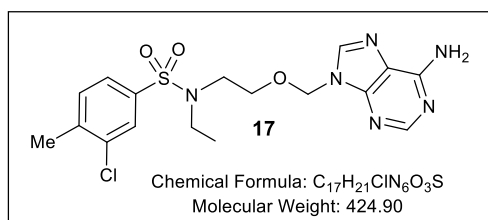

*N*-{2-[(6-amino-9H-purin-9-yl)methoxy]ethyl}-3-chloro-4-methyl-*N*-ethylbenzene-1-sulfonamide (**17**). Following **method B** with **13**, **17** (107 mg, 50%) was obtained as a white solid. *R*<sub>f</sub> 0.58 (98:2 DCM/MeOH). <sup>1</sup>H-NMR (600 MHz, DMSO-*d*<sub>6</sub>) δ 8.23 (s, 1H, H<sub>8</sub>) ; 8.16 (s, 1H, H<sub>2</sub>) ; 7.75 (d, *J* = 1.8 Hz, 1H, H<sub>Ar</sub>) ; 7.60 (dd, *J* = 8.0 Hz, 2.0 Hz, 1H,



H<sub>Ar</sub>) ; 7.52 (dd, J = 7.9 Hz, 0.8 Hz, 1H, H<sub>Ar</sub>) ; 7.30 (br. s, 2H, NH<sub>2</sub>) ; 5.52 (s, 2H, CH<sub>2</sub>) ; 3.60 (t, J = 5.8 Hz, 2H, CH<sub>2</sub>) ; 3.27 (t, J = 5.8 Hz, 2H, CH<sub>2</sub>) ; 3.13 (q, J = 7.1 Hz, 2H, CH<sub>2</sub>-CH<sub>3</sub>) ; 2.39 (s, 3H, CH<sub>3</sub>) ; 0.95 (t, J = 7.1 Hz, 3H, CH<sub>3</sub>-CH<sub>2</sub>). <sup>13</sup>C-NMR (150 MHz, DMSO-*d*<sub>6</sub>) δ 156.0 (C<sub>6</sub>) ; 152.9 (C<sub>2</sub>) ; 149.7 (C<sub>4</sub>) ; 141.0 (C<sub>8</sub>) ; 140.9 (C<sub>q Ar</sub>) ; 138.7 (C<sub>q Ar</sub>) ; 134.0 (C<sub>q Ar</sub>) ; 132.1 (CH<sub>Ar</sub>) ; 126.8 (CH<sub>Ar</sub>) ; 125.4 (CH<sub>Ar</sub>) ; 118.5 (C<sub>5</sub>) ; 71.9 (CH<sub>2</sub>) ; 67.4 (CH<sub>2</sub>) ; 46.5 (CH<sub>2 Et</sub>) ; 43.2 (CH<sub>2</sub>) ; 19.7 (CH<sub>3</sub>) ; 13.9 (CH<sub>3 Et</sub>). HRMS (ESI+): m/z calc. for C<sub>17</sub>H<sub>22</sub>ClN<sub>6</sub>O<sub>3</sub>S [M+H]<sup>+</sup>: 425.1157, Found 425.1159.

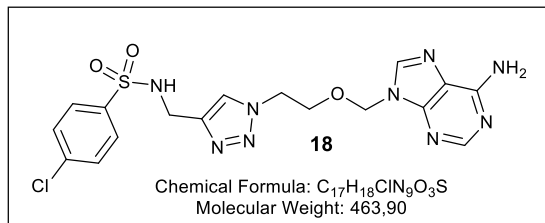

*N*-[(1-[2-[(6-amino-9H-purin-9-yl)methoxy]ethyl]-1H-1,2,3-triazol-4-yl)methyl]-4-chlorobenzene-1-sulfonamide (**18**). Following **method C** with **23** (50 mg), **18** (73 mg, 74%) was obtained as a white solid. R<sub>f</sub> 0.34 (98:2 DCM/MeOH). <sup>1</sup>H-NMR (600 MHz, DMSO-*d*<sub>6</sub>) δ 8.28 – 8.14 (m, 3H, H<sub>2</sub>, H<sub>8</sub>, NH) ; 7.79 (s, 1H, H<sub>Triazole</sub>) ; 7.78 – 7.73 (m, 2H, 2H<sub>Ar</sub>) ; 7.66 – 7.60 (m, 2H, 2H<sub>Ar</sub>) ; 7.75 (d, J = 1.8 Hz, 1H, H<sub>Ar</sub>) ; 7.60 (dd, J = 8.0 Hz, 2.0 Hz, 1H, H<sub>Ar</sub>) ; 7.52 (dd, J = 7.9 Hz, 0.8 Hz, 1H, H<sub>Ar</sub>) ; 7.29 (br. s, 2H, NH<sub>2</sub>) ; 5.53 (s, 2H, CH<sub>2</sub>) ; 4.44 (t, J = 5.3 Hz, 2H, CH<sub>2</sub>) ; 4.03 (d, J = 6.0 Hz, 2H, N-CH<sub>2</sub>) ; 3.86 (t, J = 5.8 Hz, 2H, CH<sub>2</sub>). <sup>13</sup>C-NMR (150 MHz, DMSO-*d*<sub>6</sub>) δ 156.0 (C<sub>6</sub>) ; 152.9 (C<sub>2</sub>) ; 149.7 (C<sub>4</sub>) ; 142.9 (C<sub>q Triazole</sub>) ; 141.0 (C<sub>8</sub>) ; 139.3 (C<sub>q Ar</sub>) ; 137.2 (C<sub>q Ar</sub>) ; 129.2 (CH<sub>Ar</sub>) ; 128.5 (CH<sub>Ar</sub>) ; 123.6 (CH<sub>Triazole</sub>) ; 118.5 (C<sub>5</sub>) ; 71.8 (CH<sub>2</sub>) ; 67.2 (CH<sub>2</sub>) ; 49.0 (CH<sub>2</sub>) ; 38.0 (N-CH<sub>2</sub>) ; 13.9 (CH<sub>3 Et</sub>). HRMS (ESI+): m/z calc. for C<sub>17</sub>H<sub>19</sub>ClN<sub>9</sub>O<sub>3</sub>S [M+H]<sup>+</sup>: 464.1015, Found 464.1016.

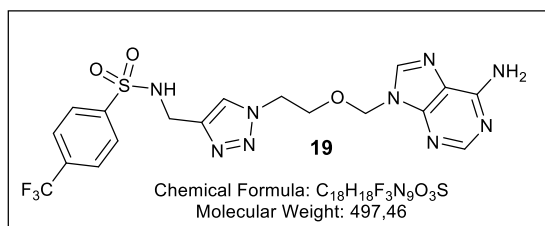

*N*-[(1-[2-[(6-amino-9H-purin-9-yl)methoxy]ethyl]-1H-1,2,3-triazol-4-yl)methyl]-4-trifluoromethylbenzene-1-sulfonamide (**19**). Following **method C** with **23** (50 mg), **19** (73 mg, 69%) was obtained as a white solid. R<sub>f</sub> 0.34 (98:2 DCM/MeOH). <sup>1</sup>H-NMR (600 MHz, DMSO-*d*<sub>6</sub>) δ 8.41 (t, J = 6.0 Hz, 1H, NH) ; 8.21 (s, 1H, H<sub>8</sub>) ; 8.17 (s, 1H, H<sub>2</sub>) ; 7.99 – 7.91 (m, 4H, 4H<sub>Ar</sub>) ; 7.79 (s, 1H, H<sub>Triazole</sub>) ; 7.29 (br. s, 2H, NH<sub>2</sub>) ; 5.52 (s, 2H, CH<sub>2</sub>) ; 4.42 (t, J = 5.2 Hz, 2H, CH<sub>2</sub>) ; 4.07 (d, J = 5.8 Hz, 2H, N-CH<sub>2</sub>) ; 3.86 (t, J = 5.2 Hz, 2H, CH<sub>2</sub>). <sup>13</sup>C-NMR (150 MHz, DMSO-*d*<sub>6</sub>) δ 156.0 (C<sub>6</sub>) ; 152.9 (C<sub>2</sub>) ; 149.7 (C<sub>4</sub>) ; 144.4 (C<sub>q Ar</sub>) ; 142.9 (C<sub>q Triazole</sub>) ; 141.0 (C<sub>8</sub>) ; 132.4, 132.1, 131.9, 131.7 (C-CF<sub>3</sub>) ; 127.5 (CH<sub>Ar</sub>) ; 126.3, 126.3 (CH<sub>Ar</sub>) ; 126.2, 124.4, 122.6, 120.8 (CF<sub>3</sub>) ; 123.6 (CH<sub>Triazole</sub>) ; 118.5 (C<sub>5</sub>) ; 71.8 (CH<sub>2</sub>) ; 67.2 (CH<sub>2</sub>) ; 49.0 (CH<sub>2</sub>) ; 38.0 (N-CH<sub>2</sub>). HRMS (ESI+): m/z calc. for C<sub>18</sub>H<sub>19</sub>F<sub>3</sub>N<sub>9</sub>O<sub>3</sub>S [M+H]<sup>+</sup>: 498.1278, Found 498.1273.

## HPLC analysis of final compounds 1-19

### HPLC analysis conditions:

Column: HPLC Column Nucleodur 75/4.6 100-3 C<sub>18</sub> EC (Macherey Nagel)

Temperature: 30 °C

Mobile phase: eluent A: 1% ACN in 12.5 mM TEAAc buffer, pH 7; eluent B: 80% ACN in 12.5 mM TEAAc buffer, pH 7

Gradient: 10% to 100% of eluent B during 20 min. Flow rate: 1.0 mL/min

UV detection at wavelength 260 nm

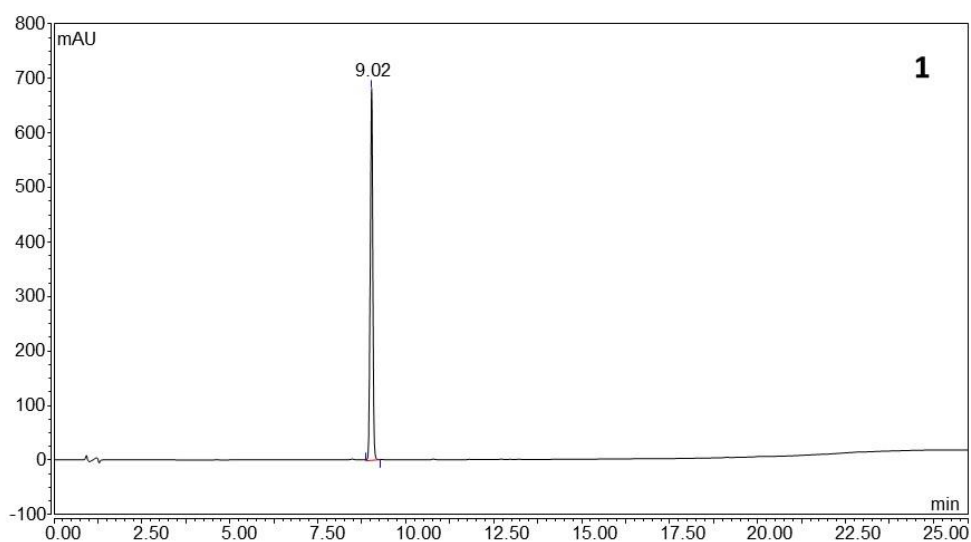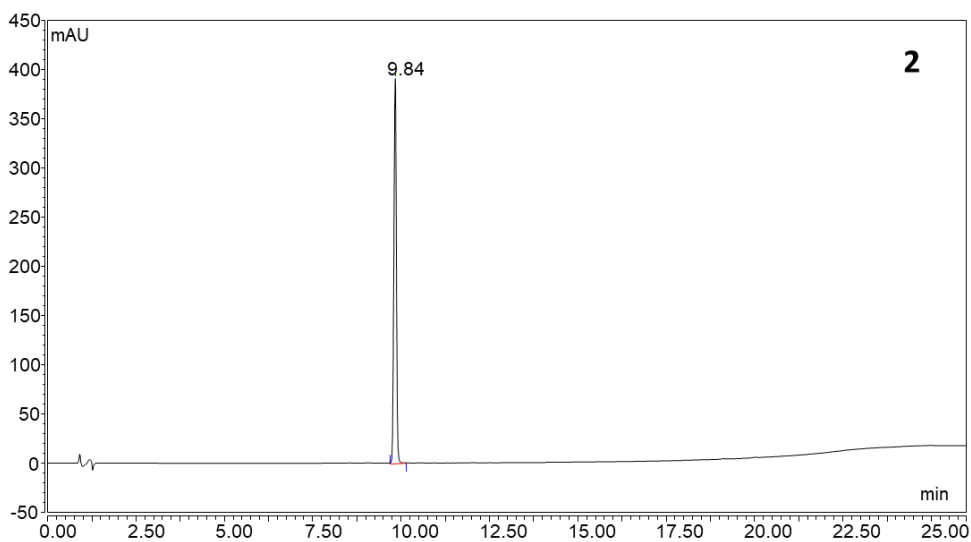

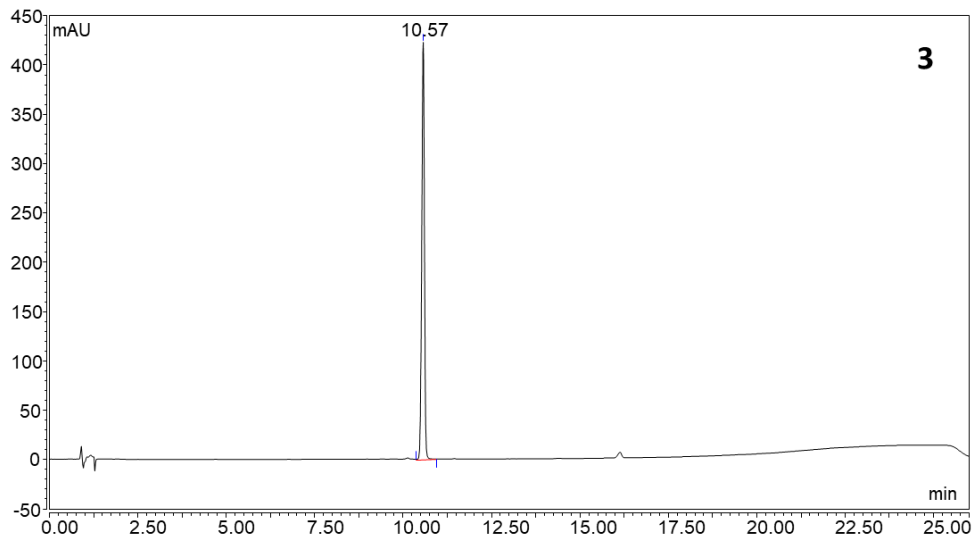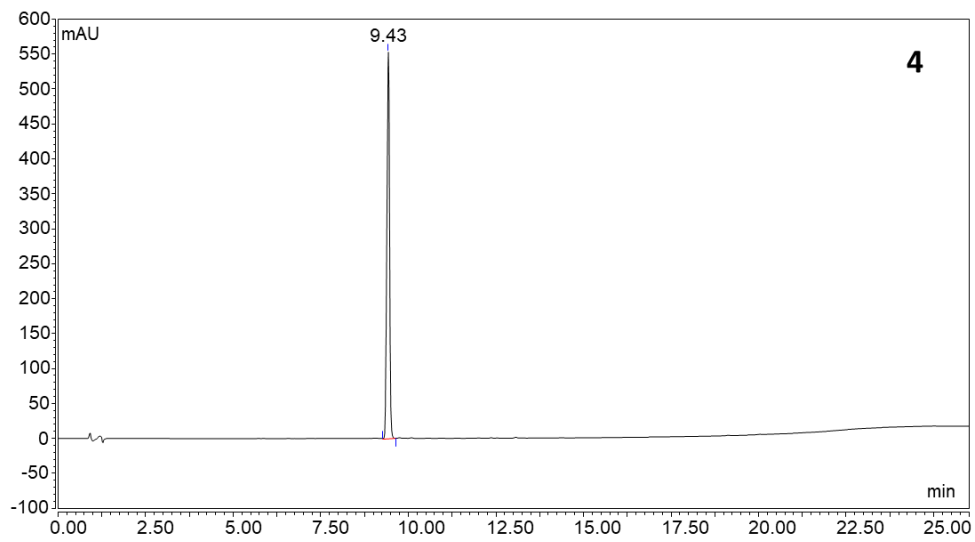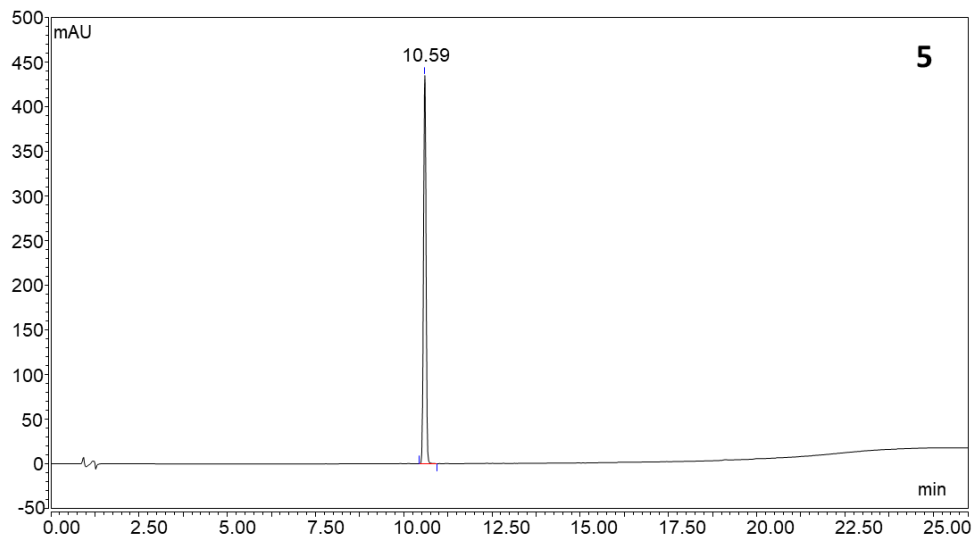

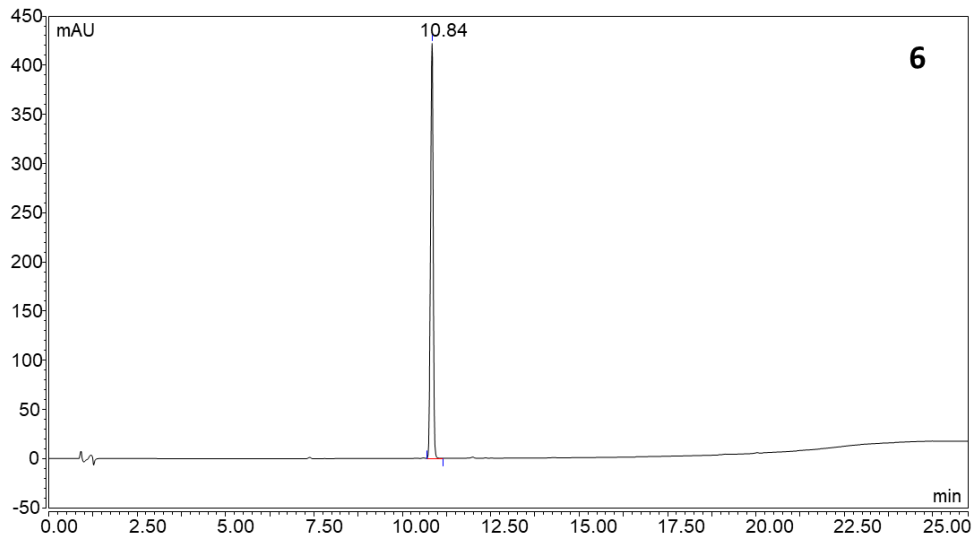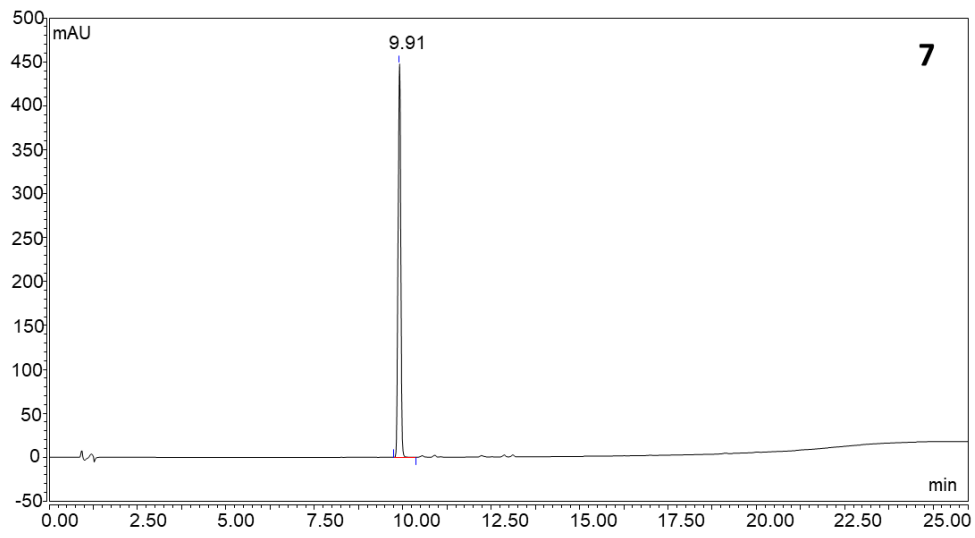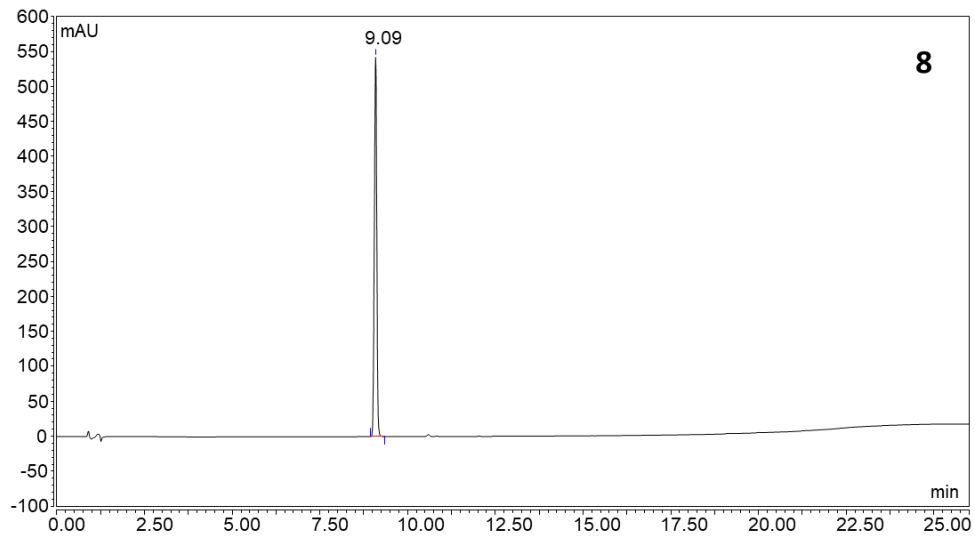

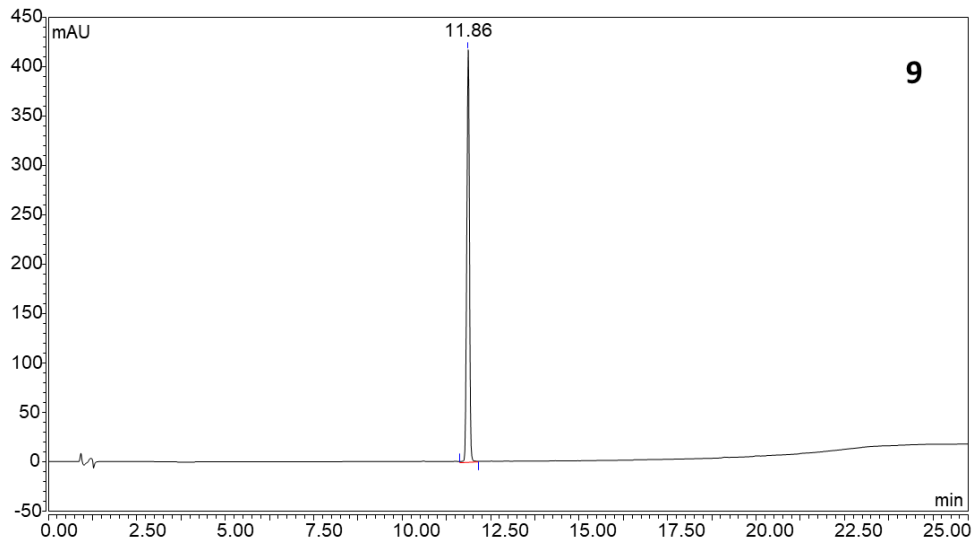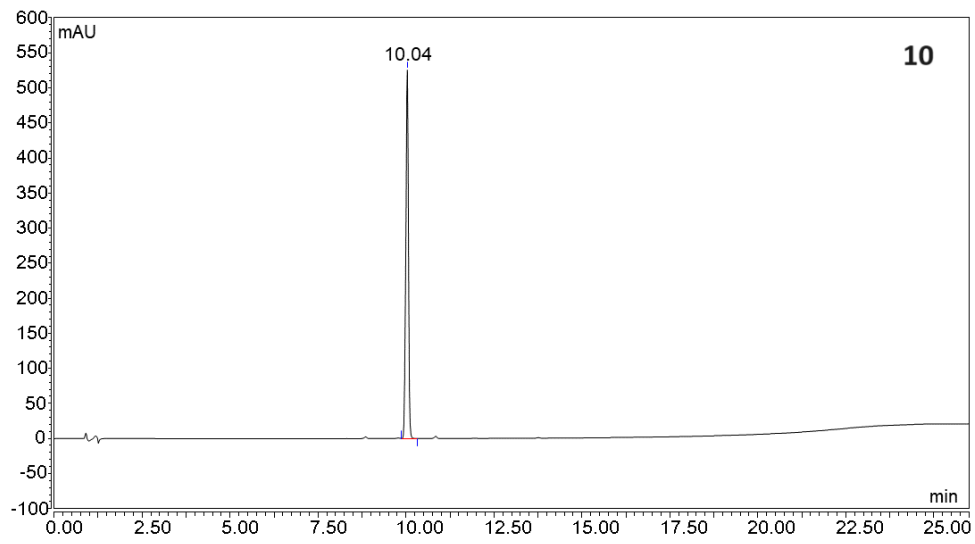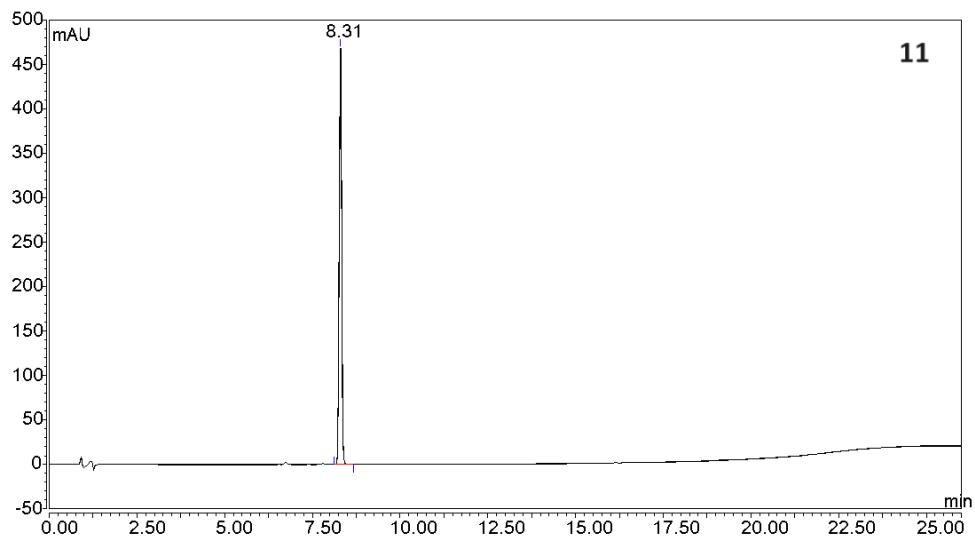

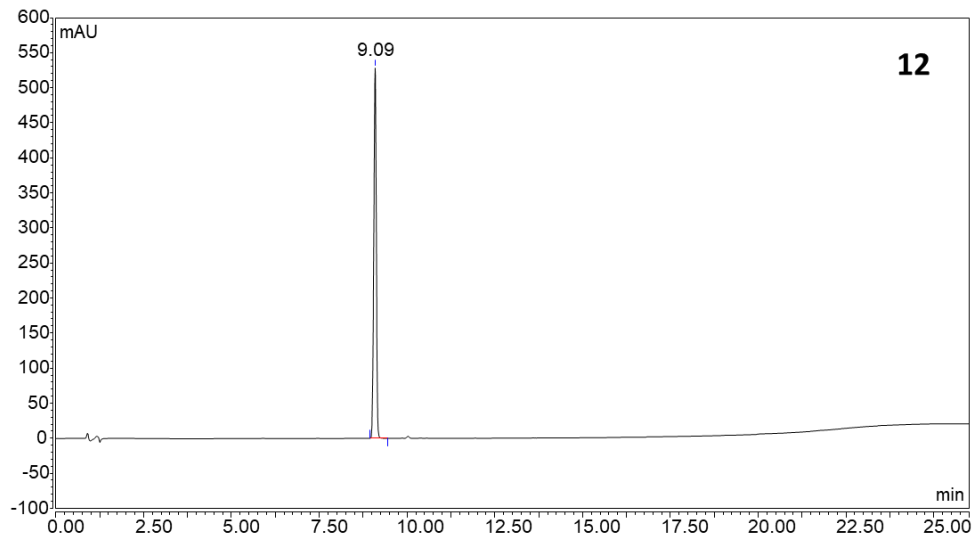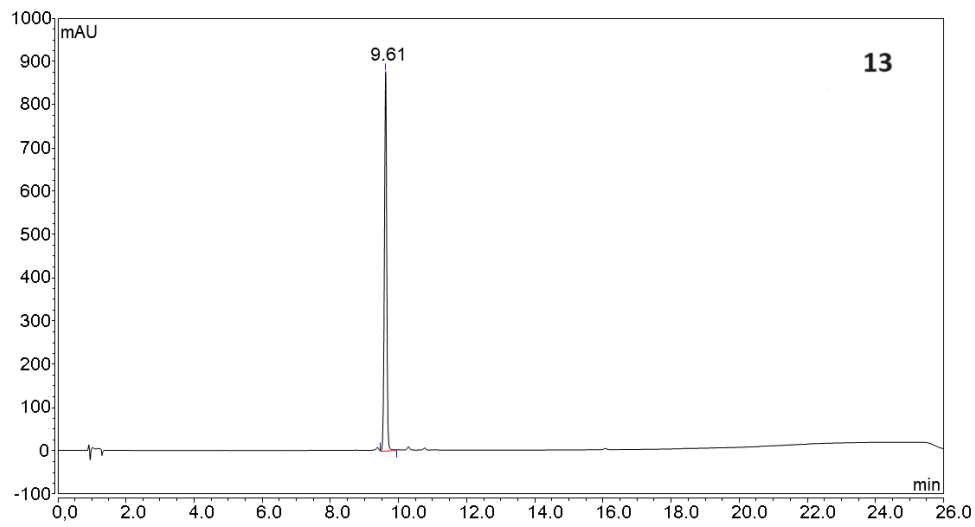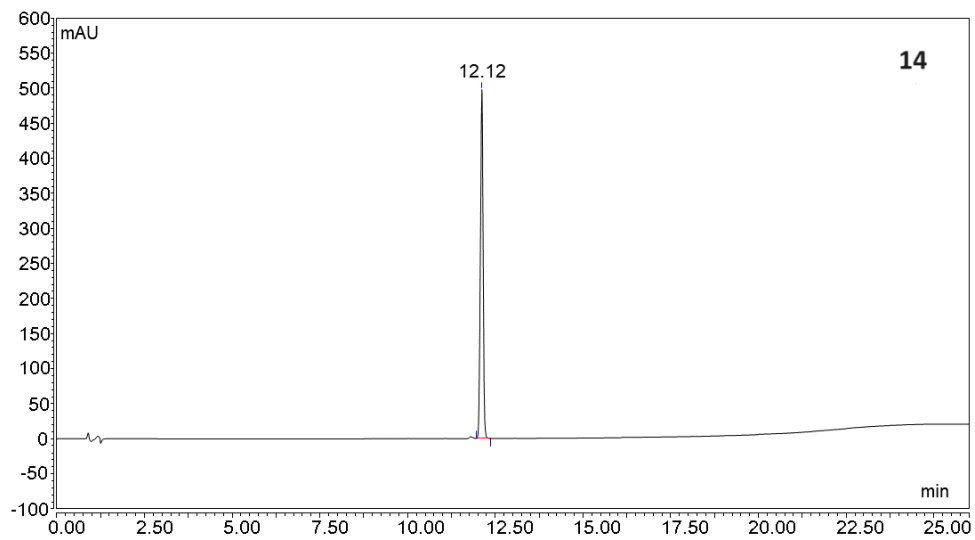

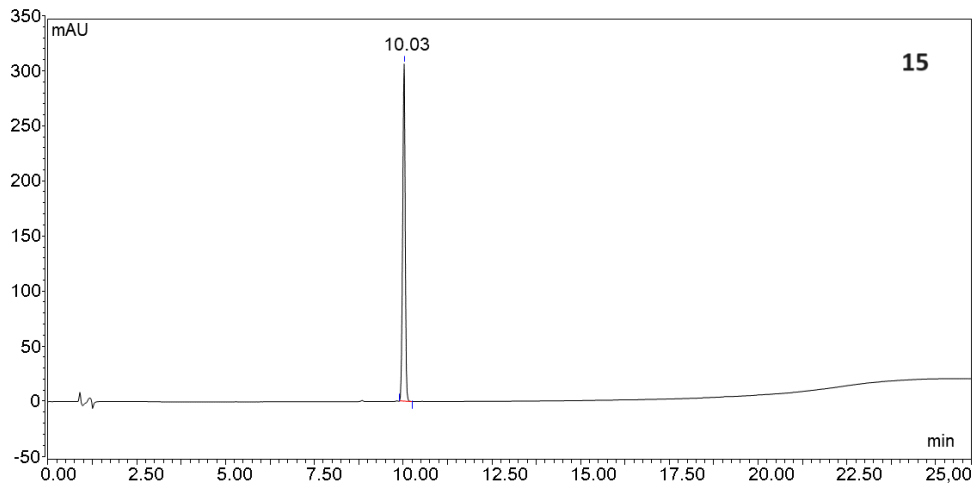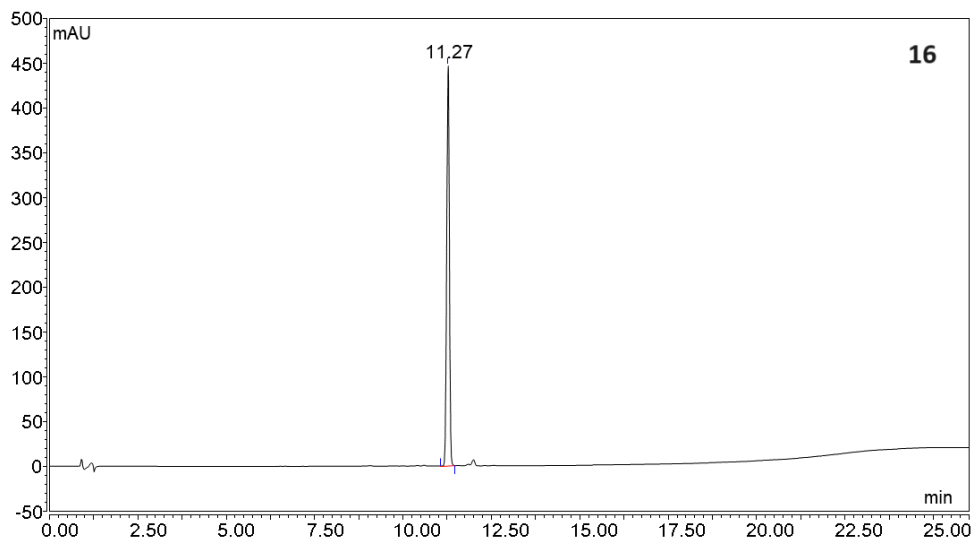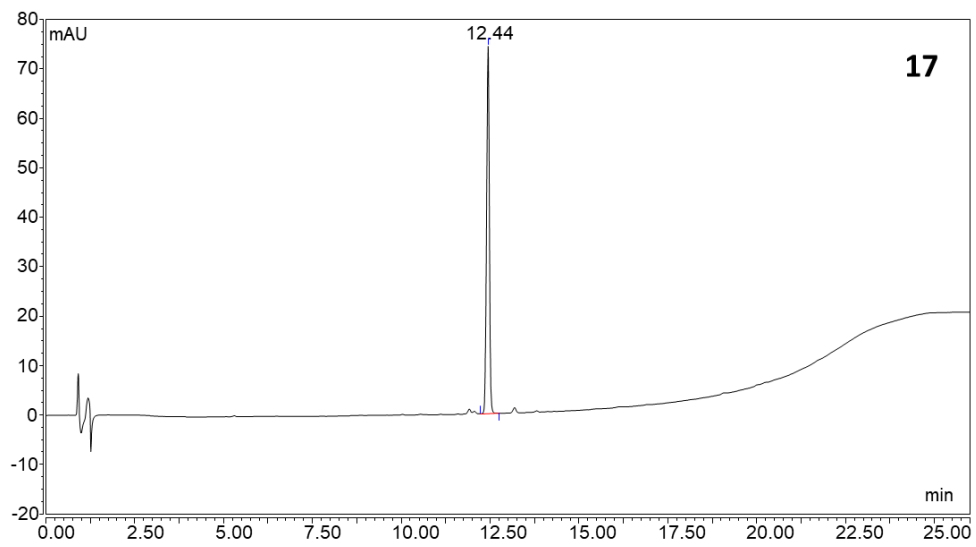

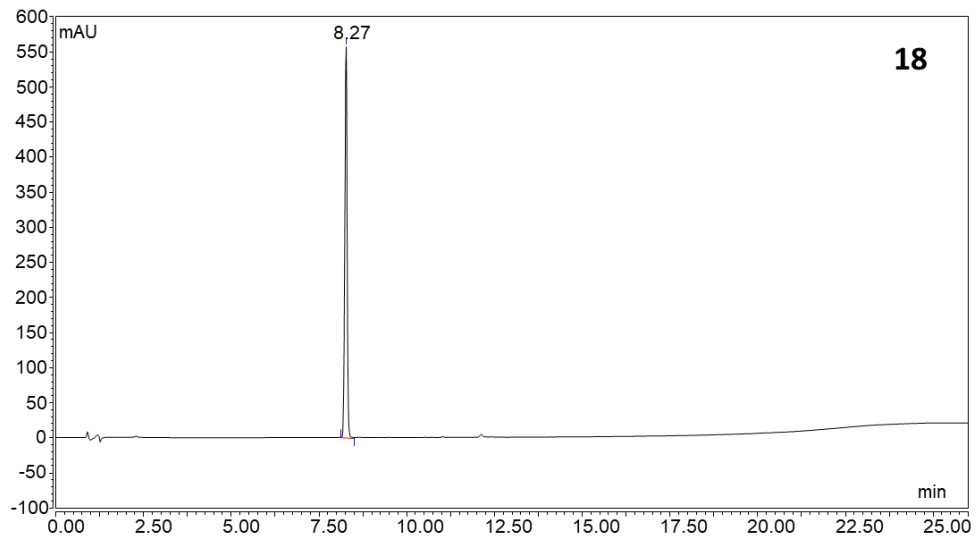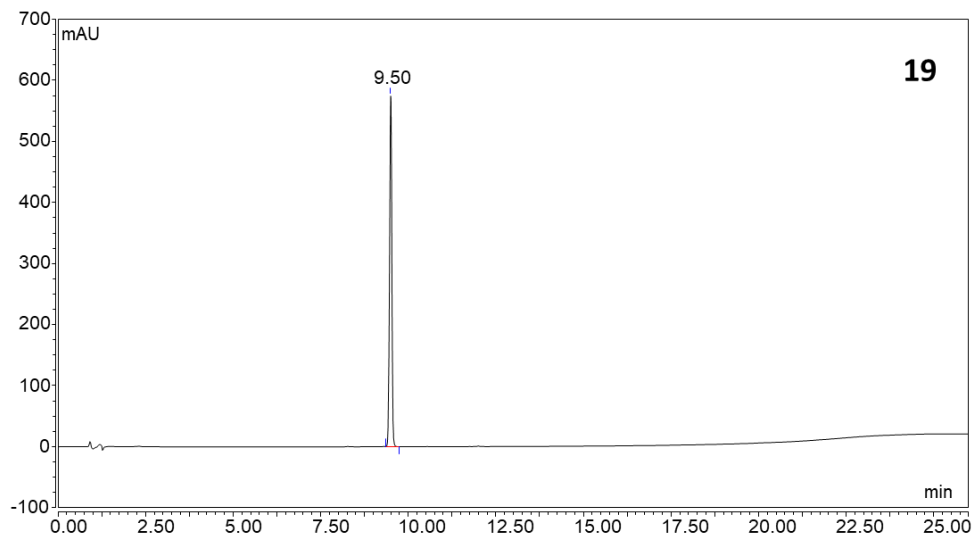



# <sup>1</sup>H-NMR and <sup>13</sup>C-NMR spectra of compounds 1-19

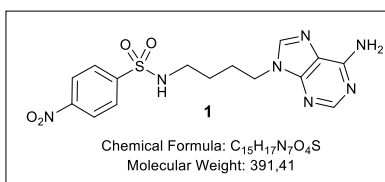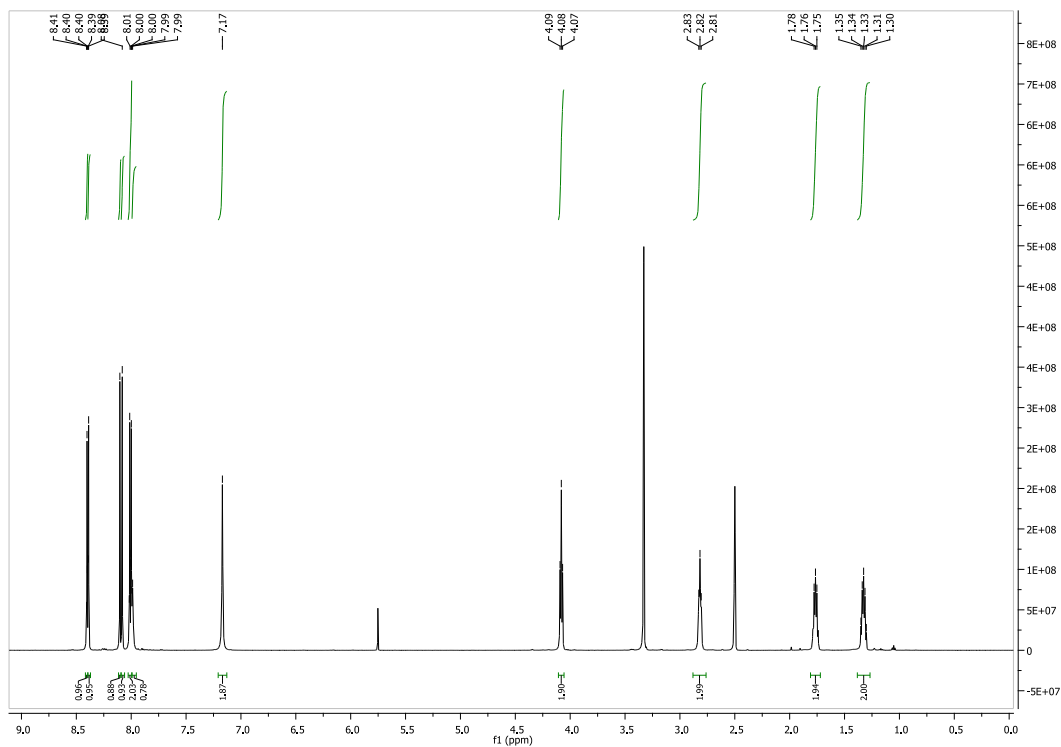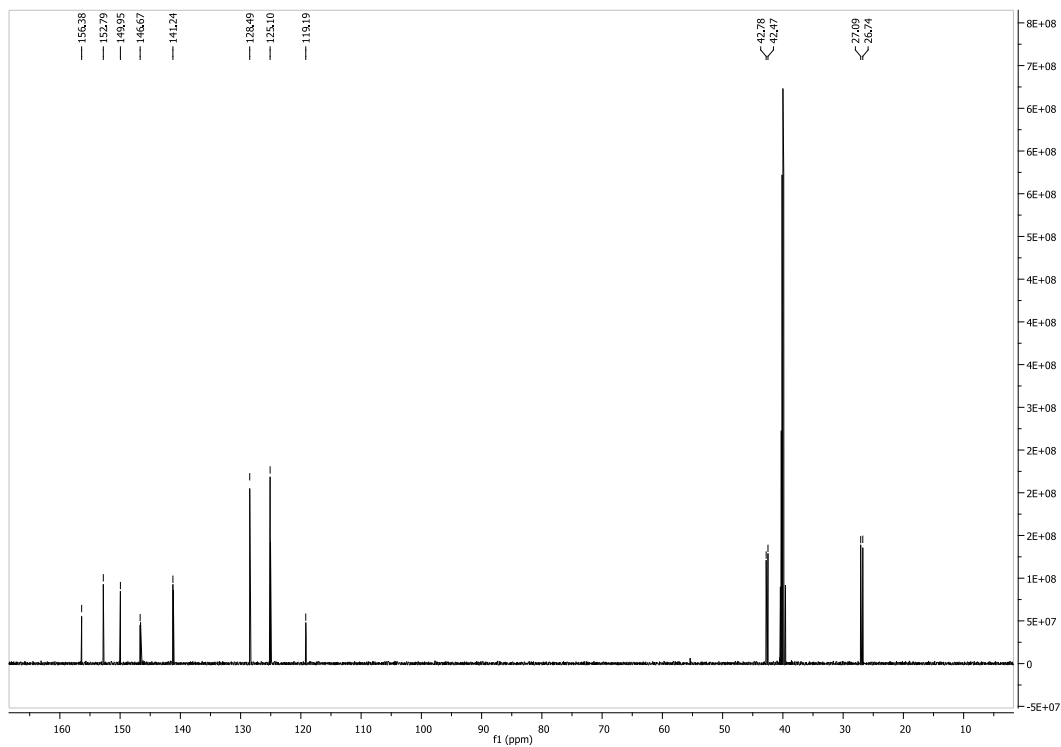

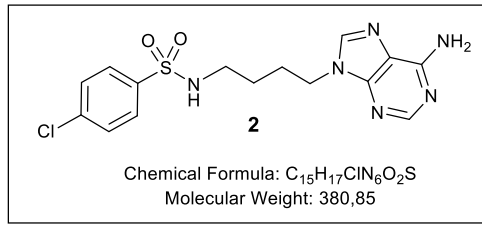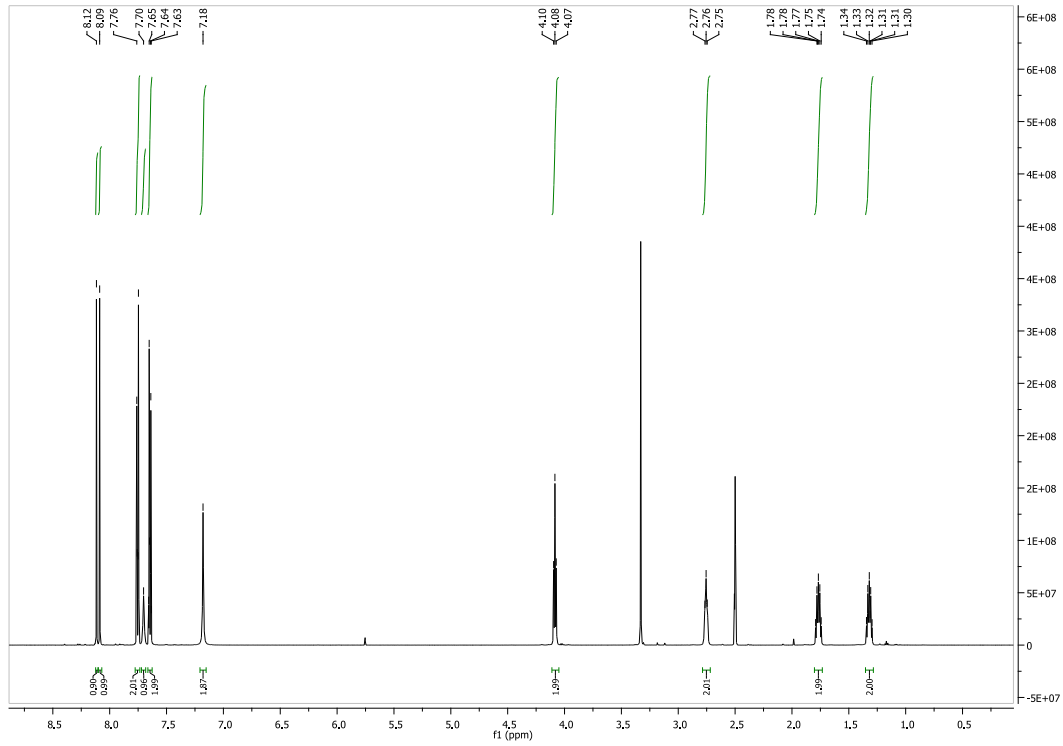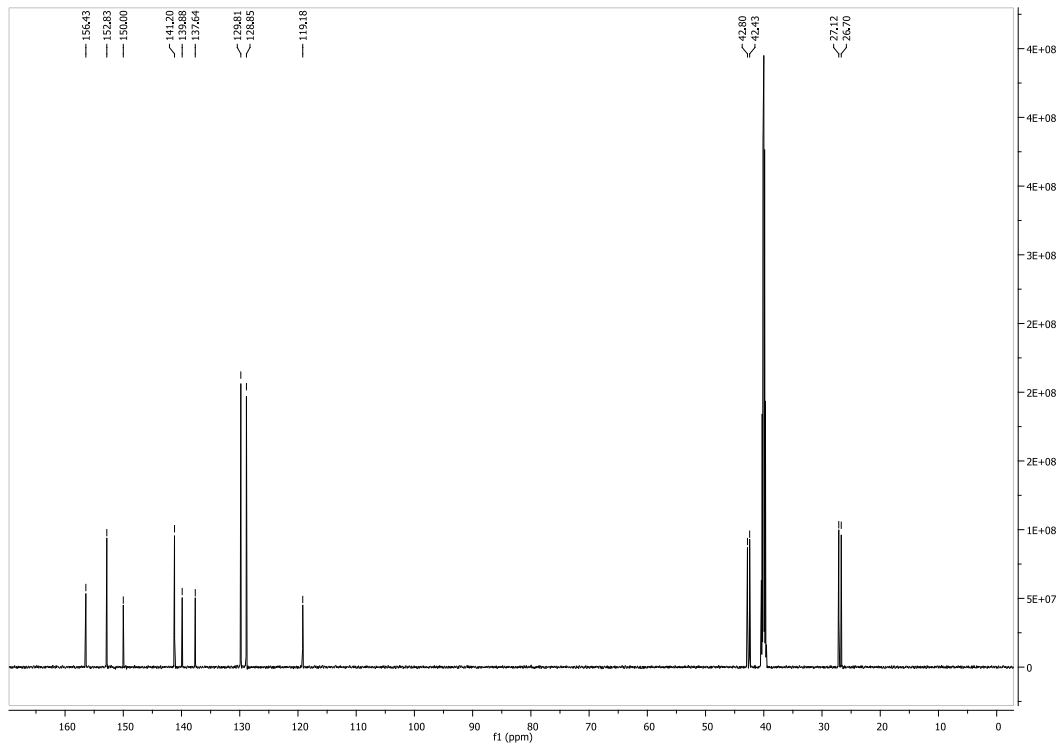

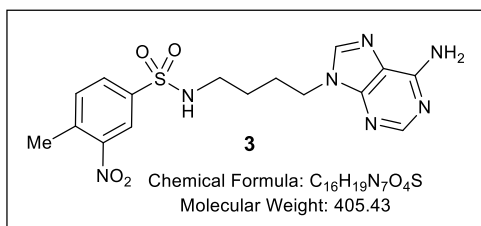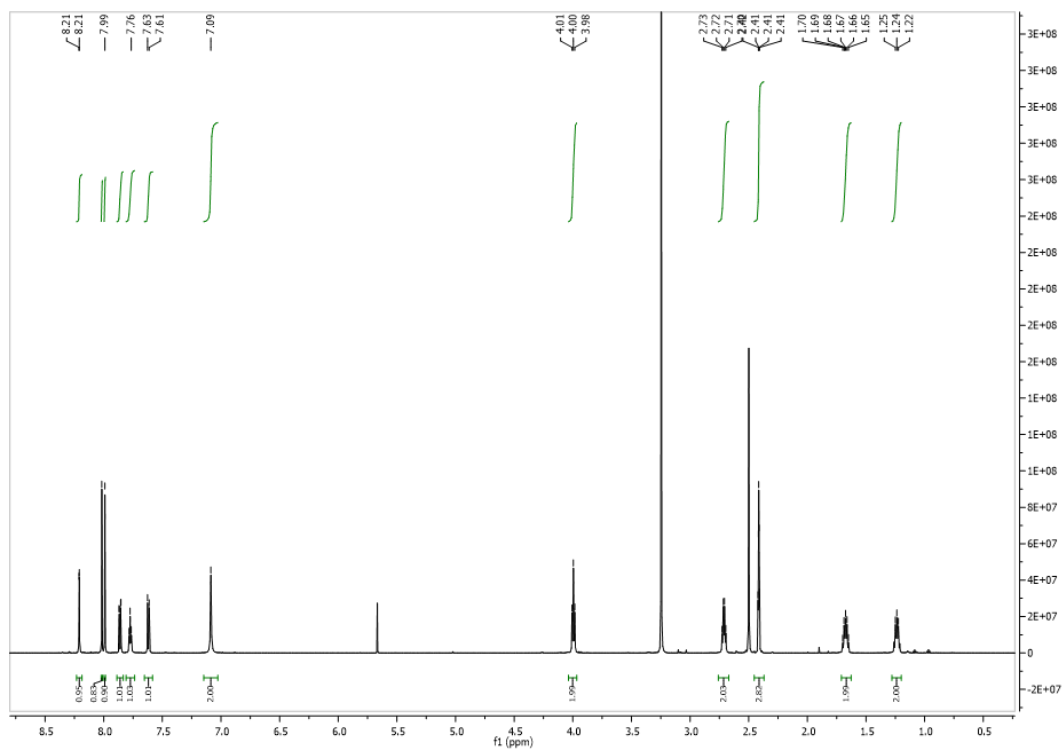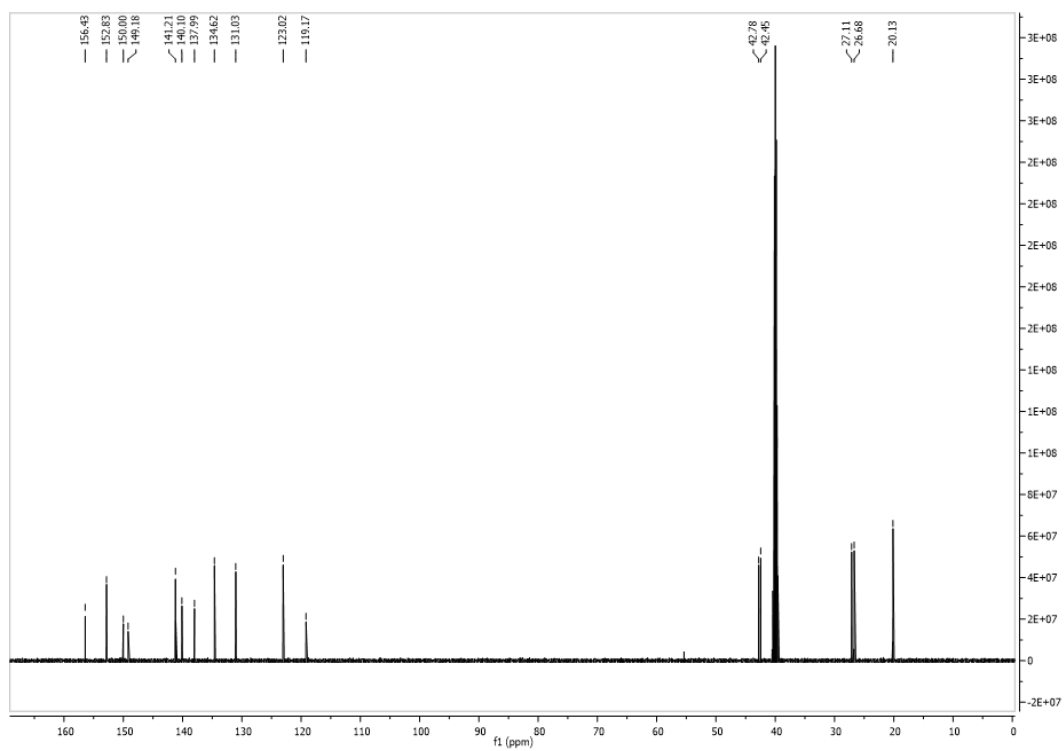

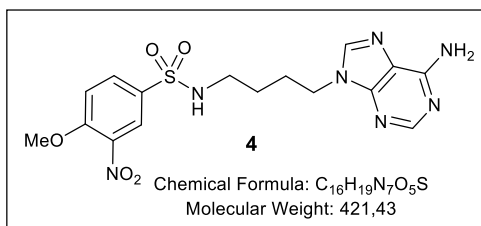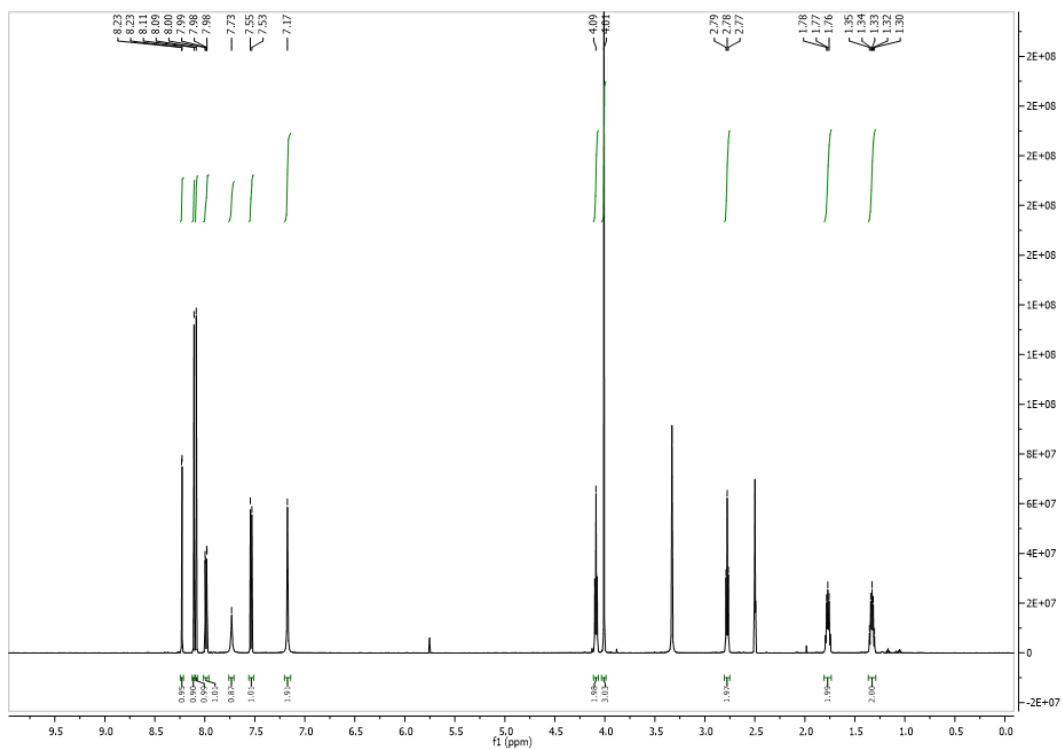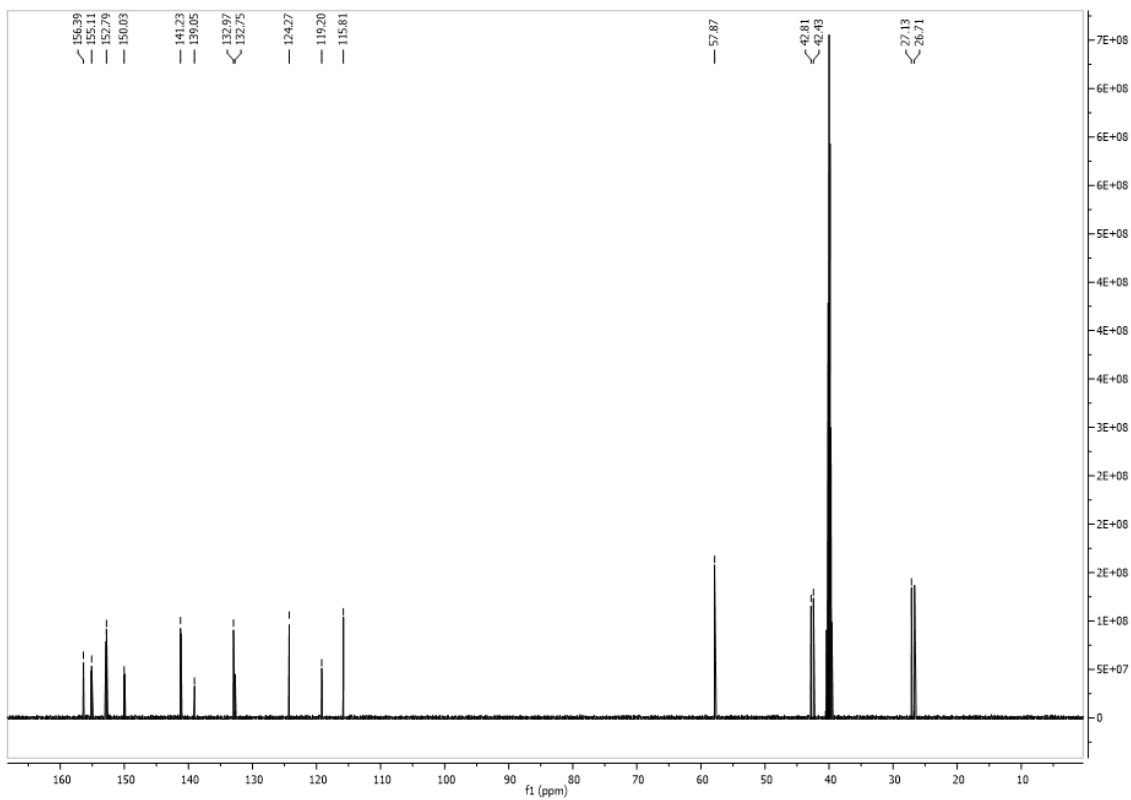

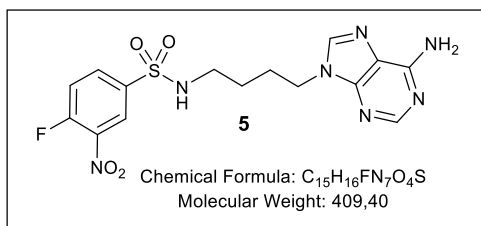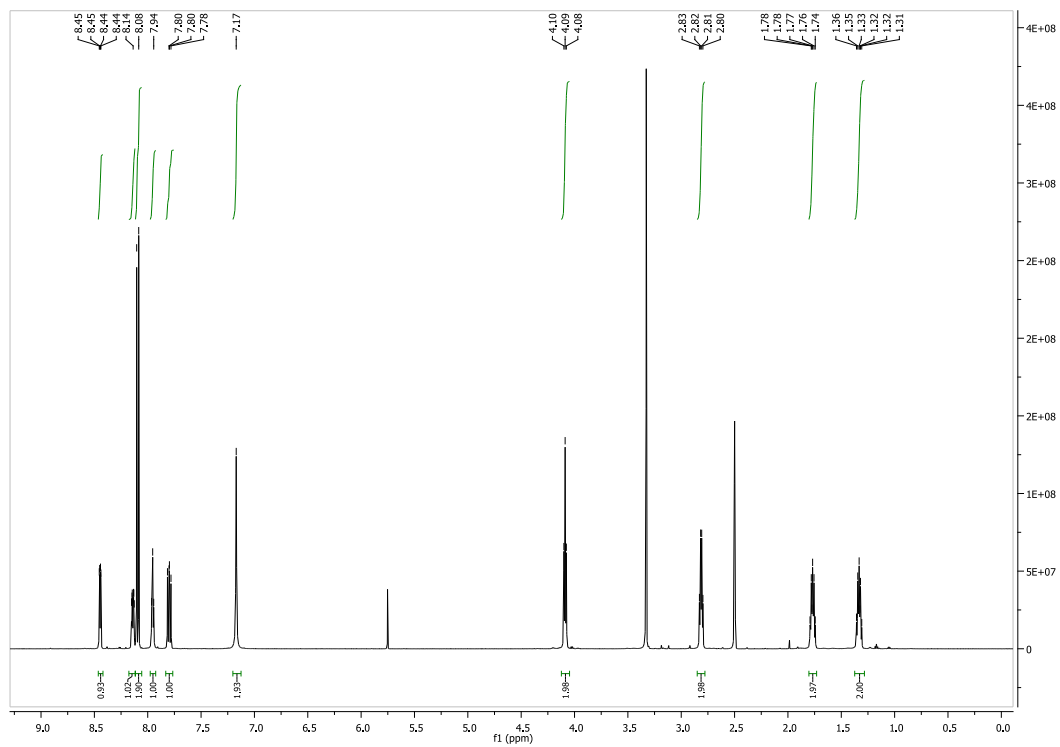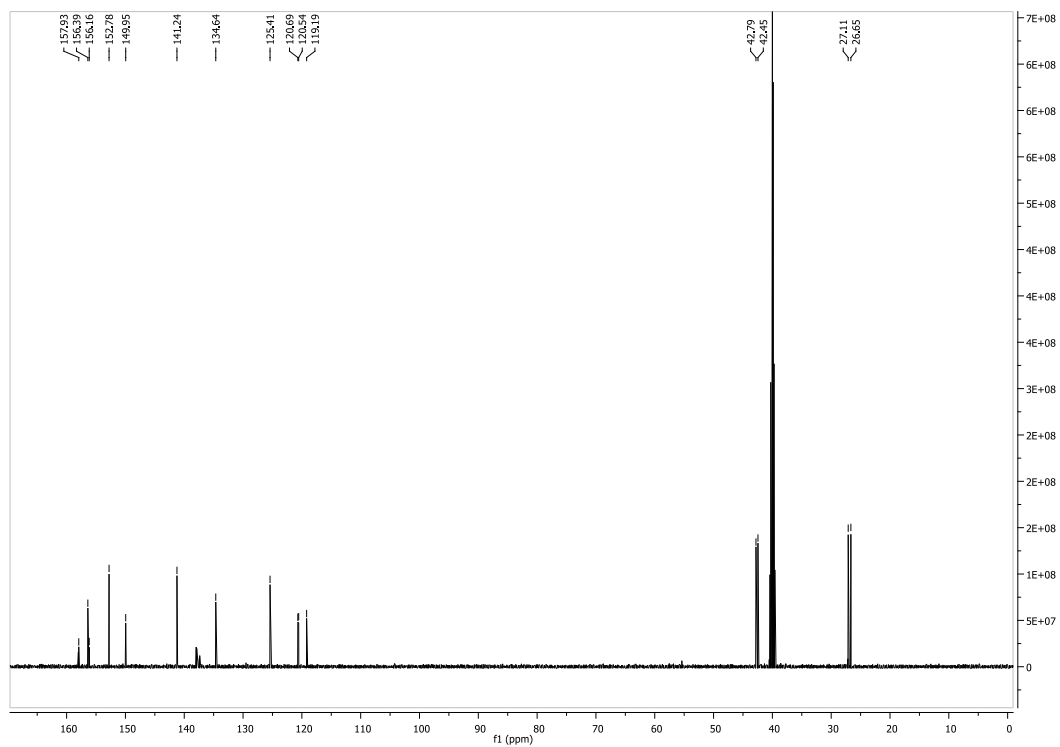

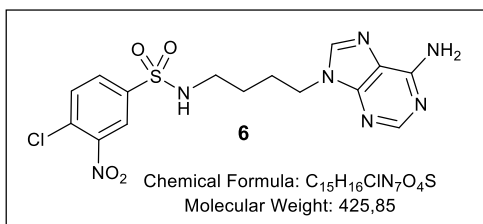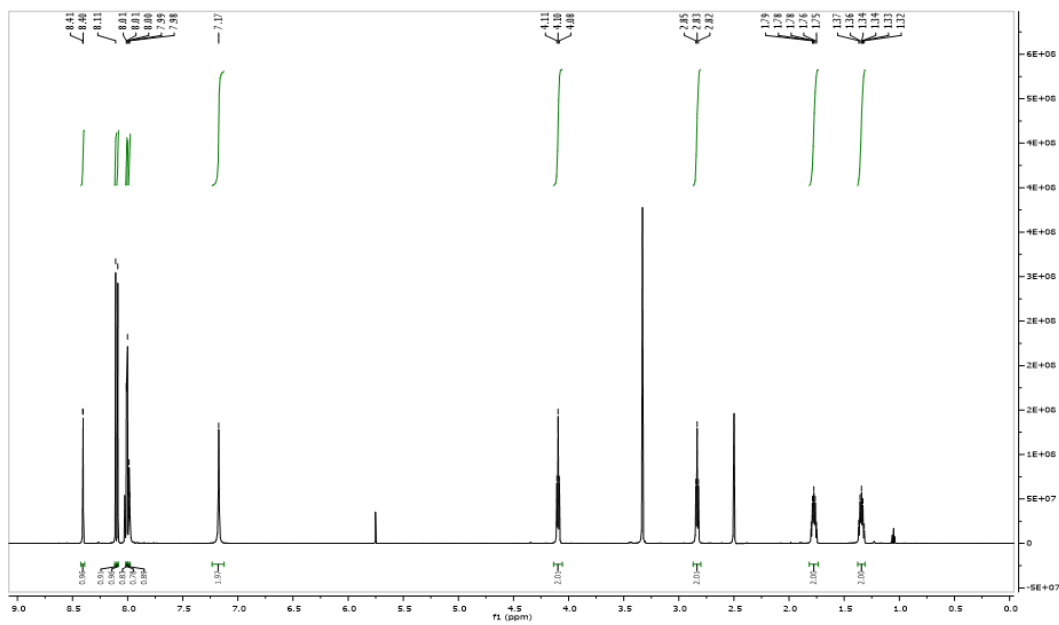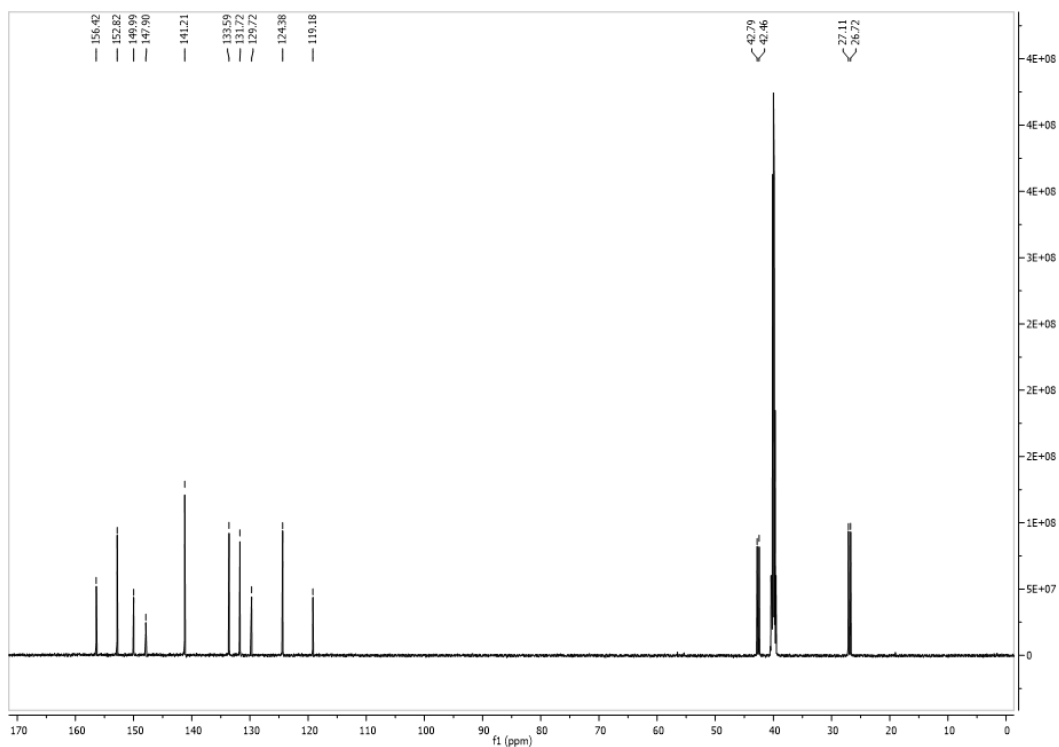

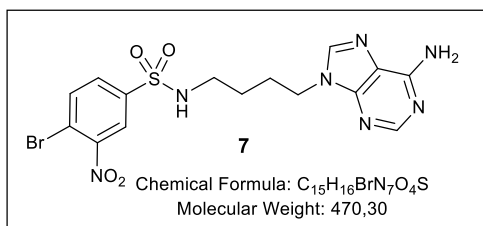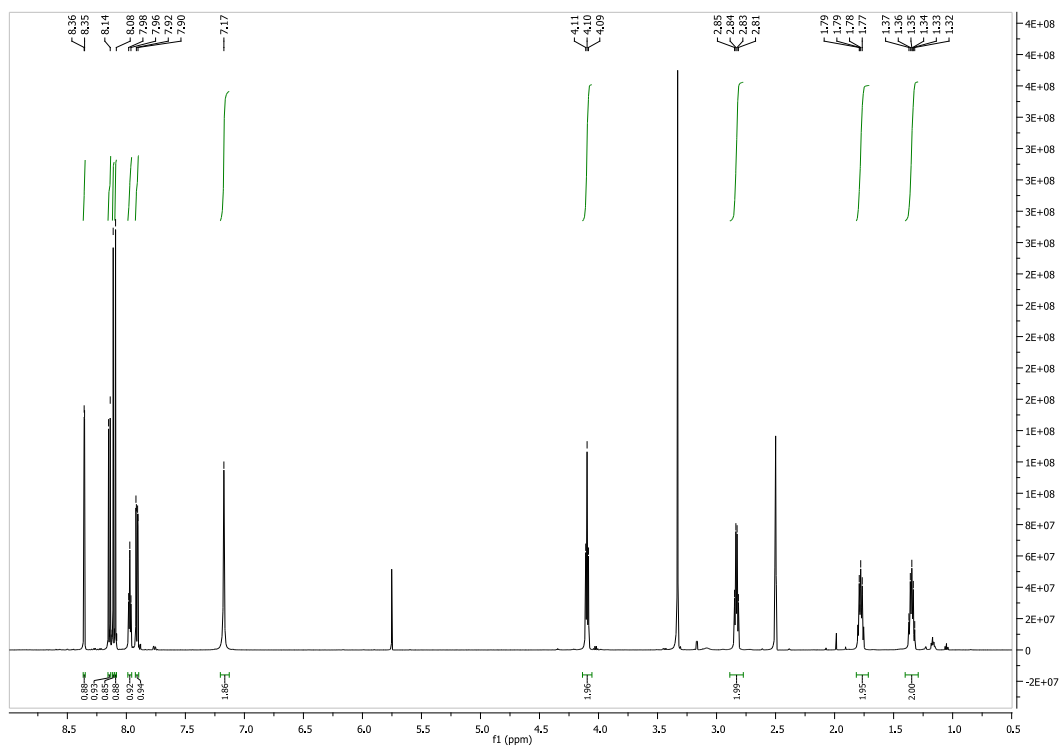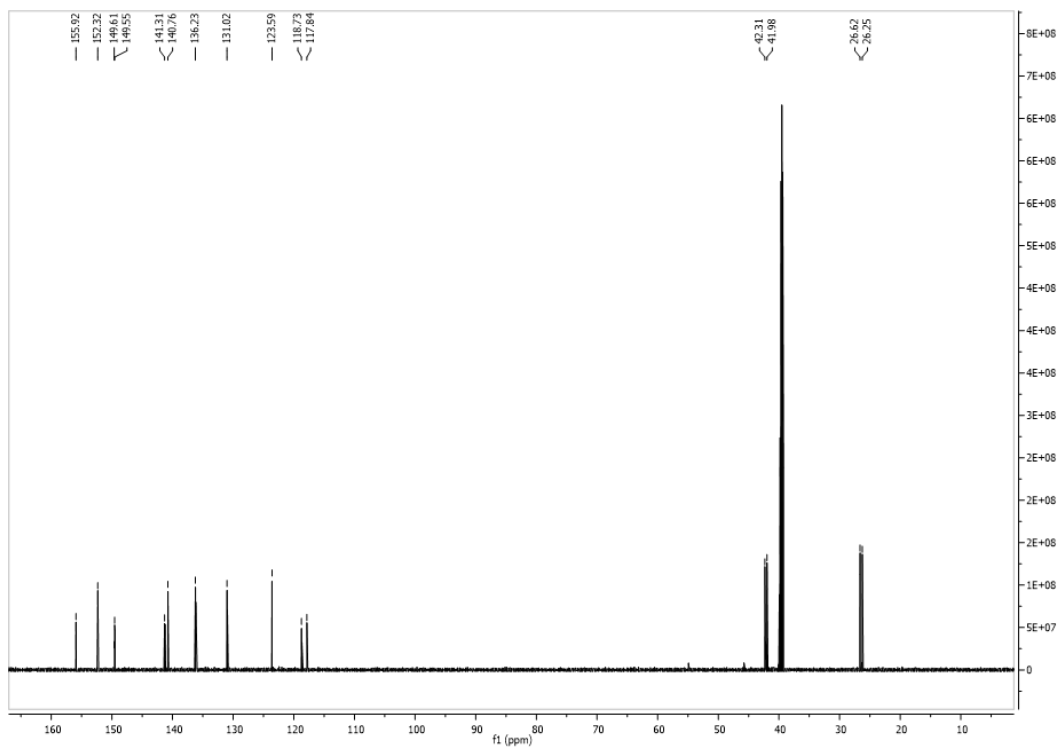

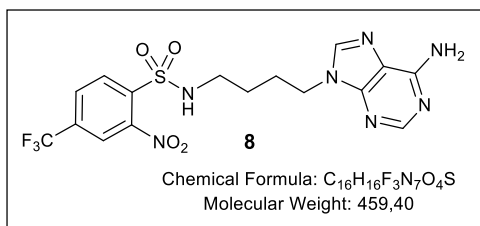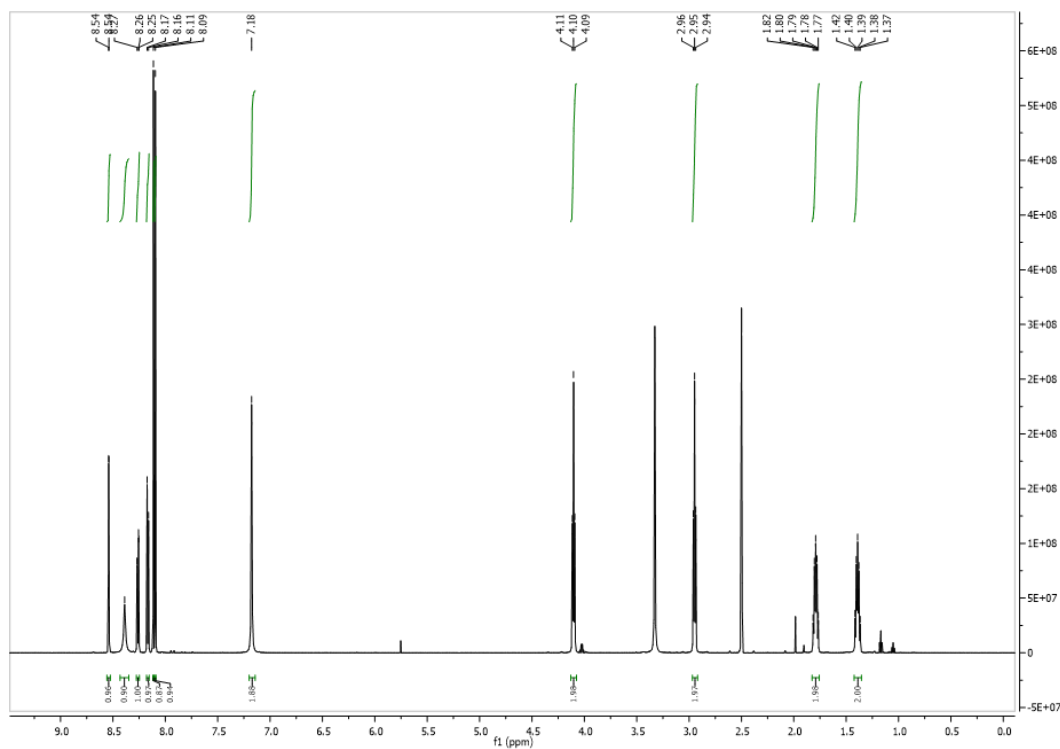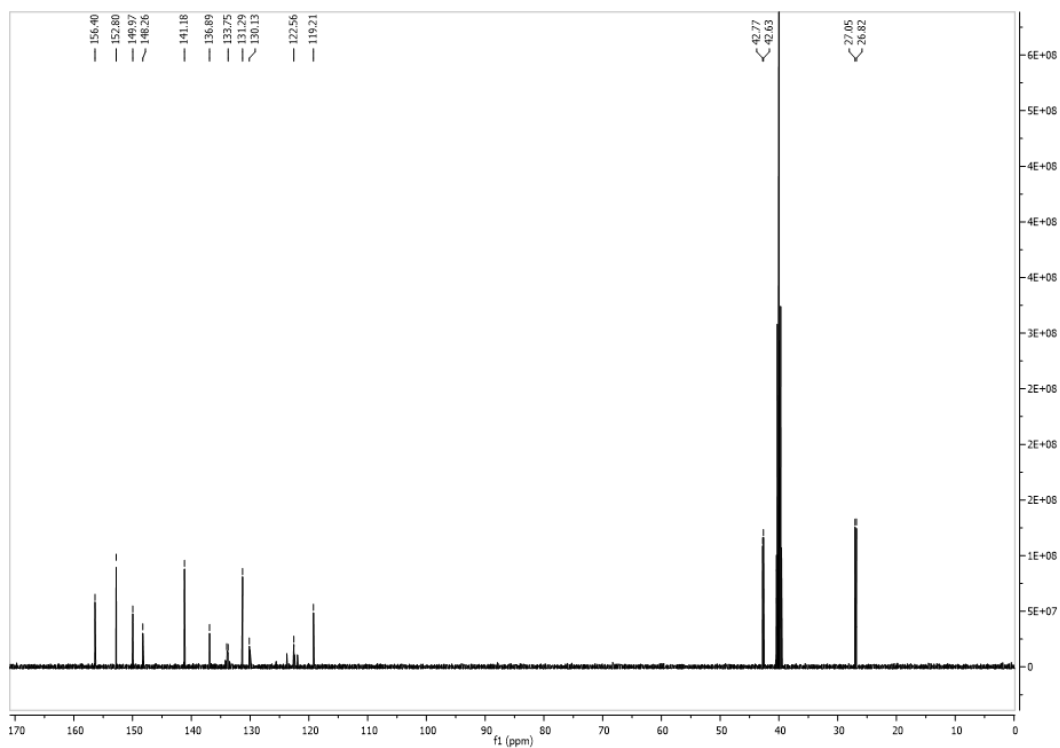



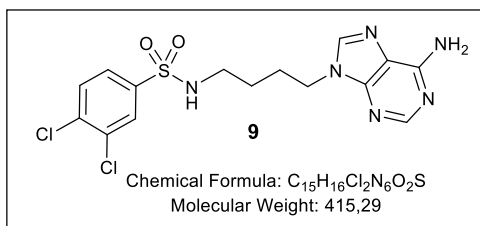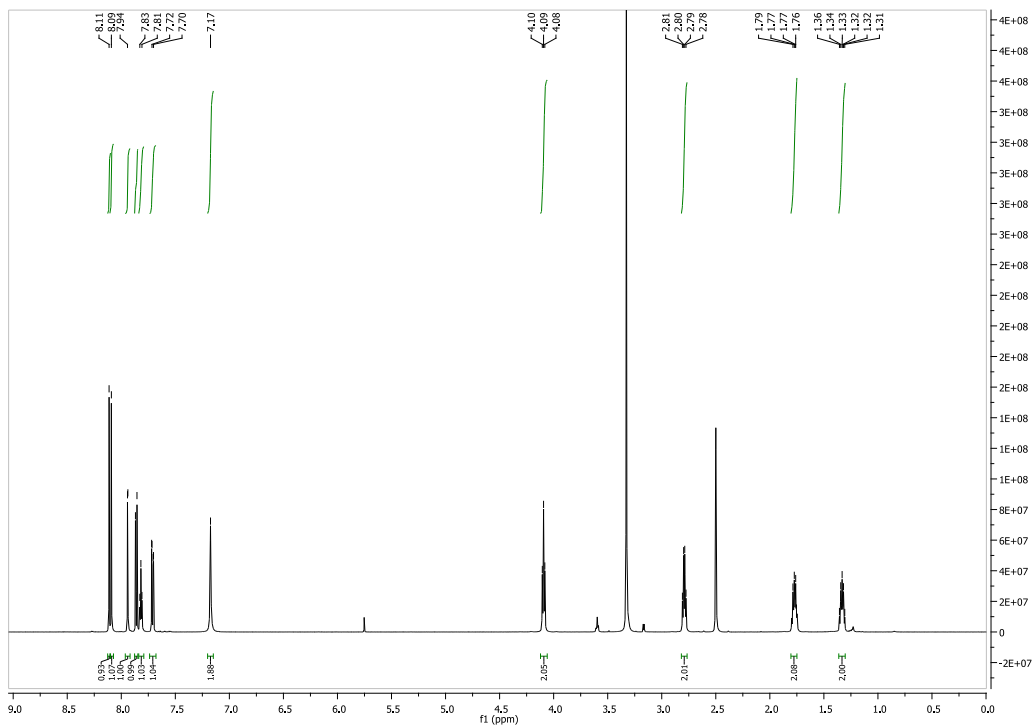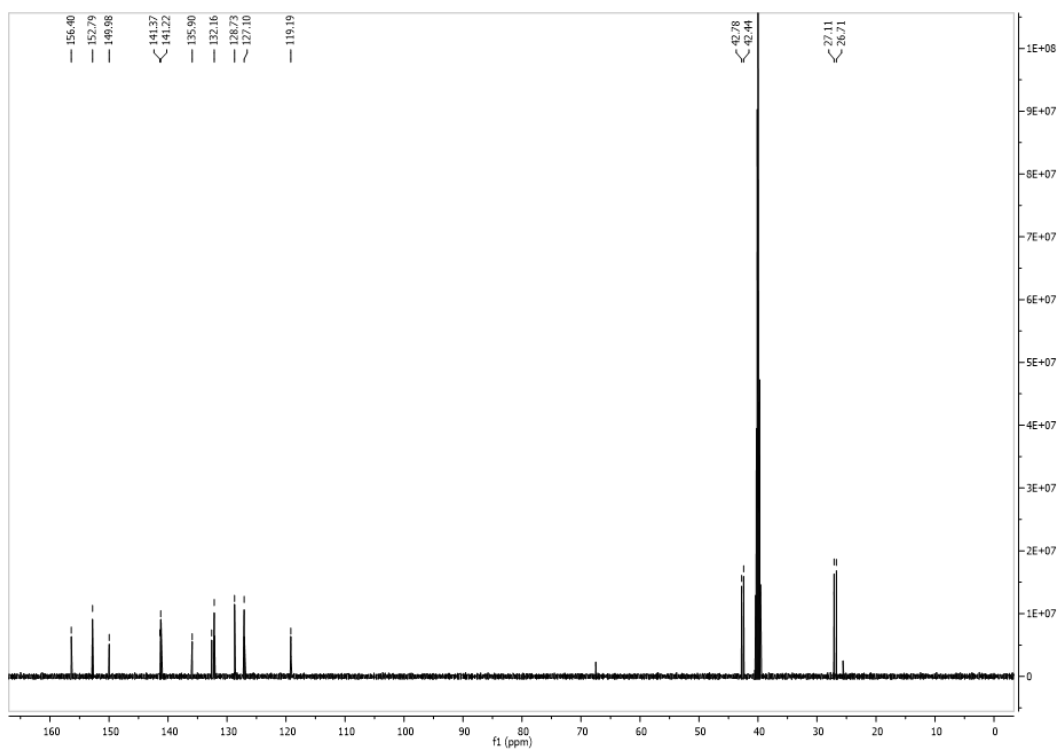

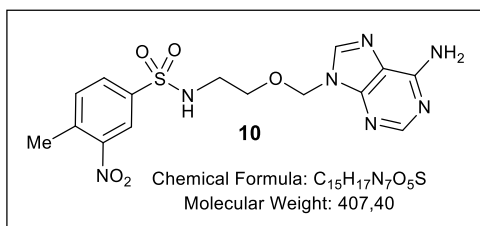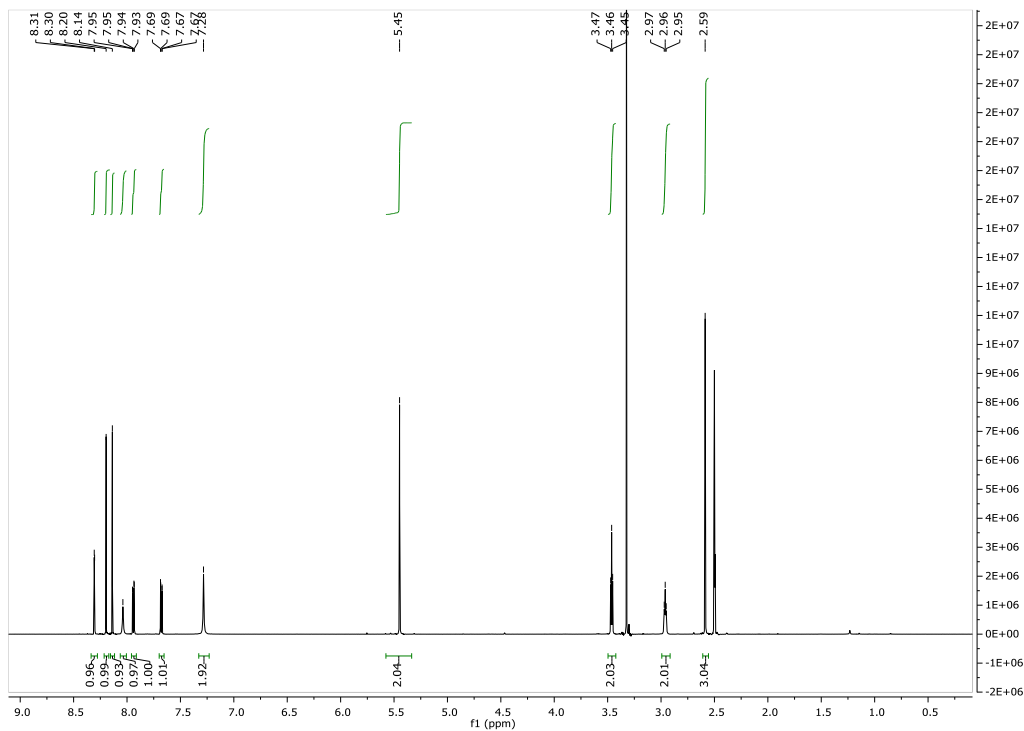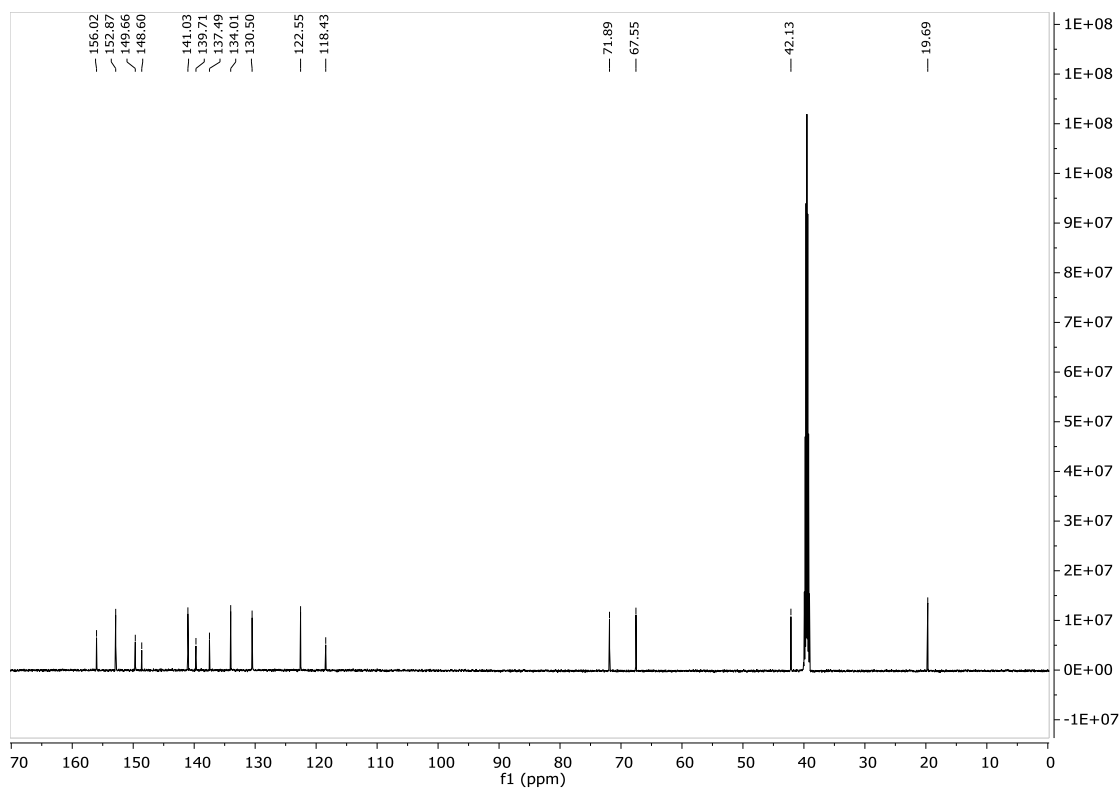

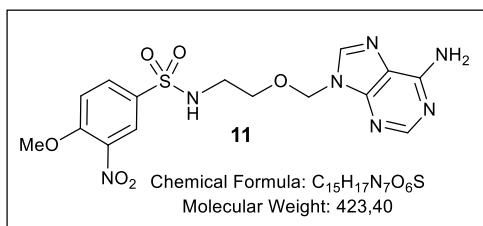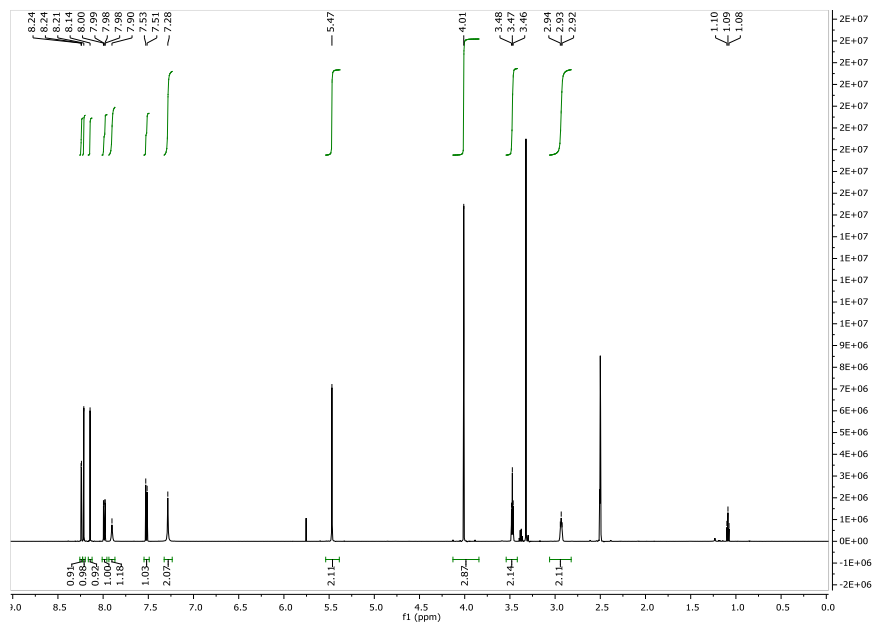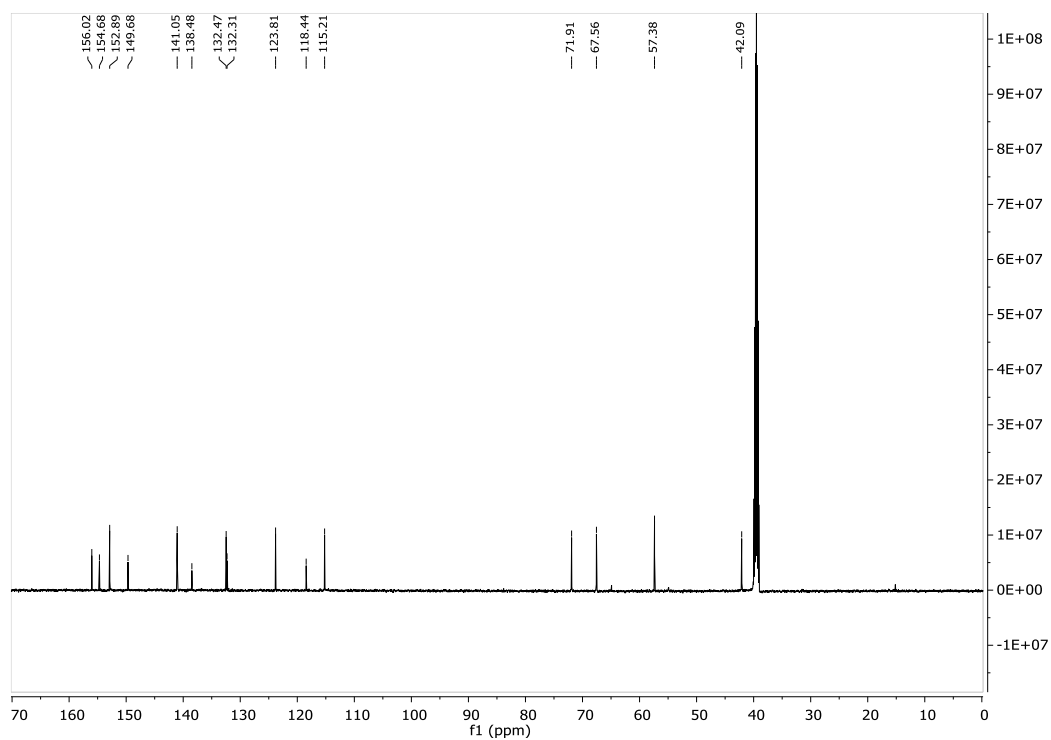

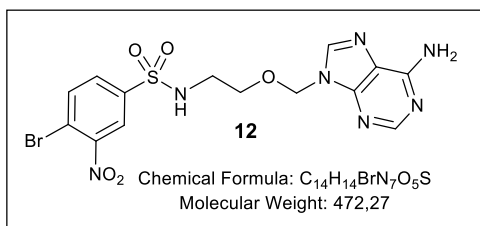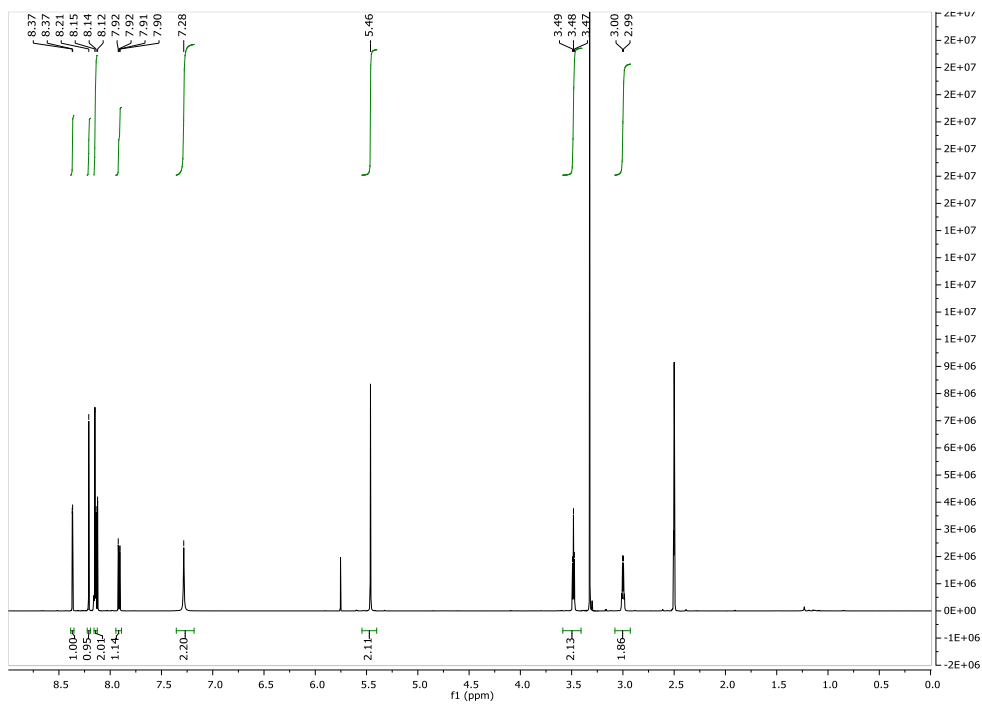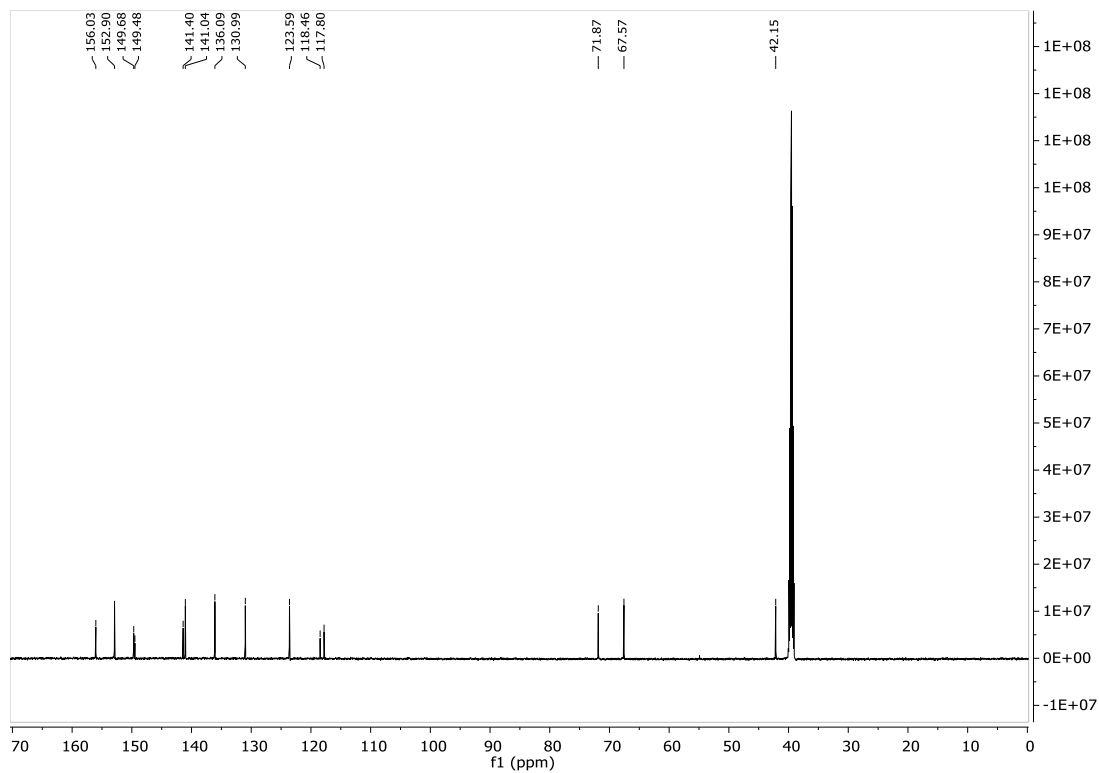

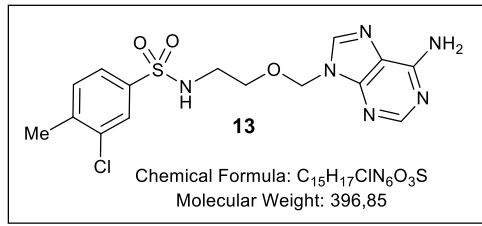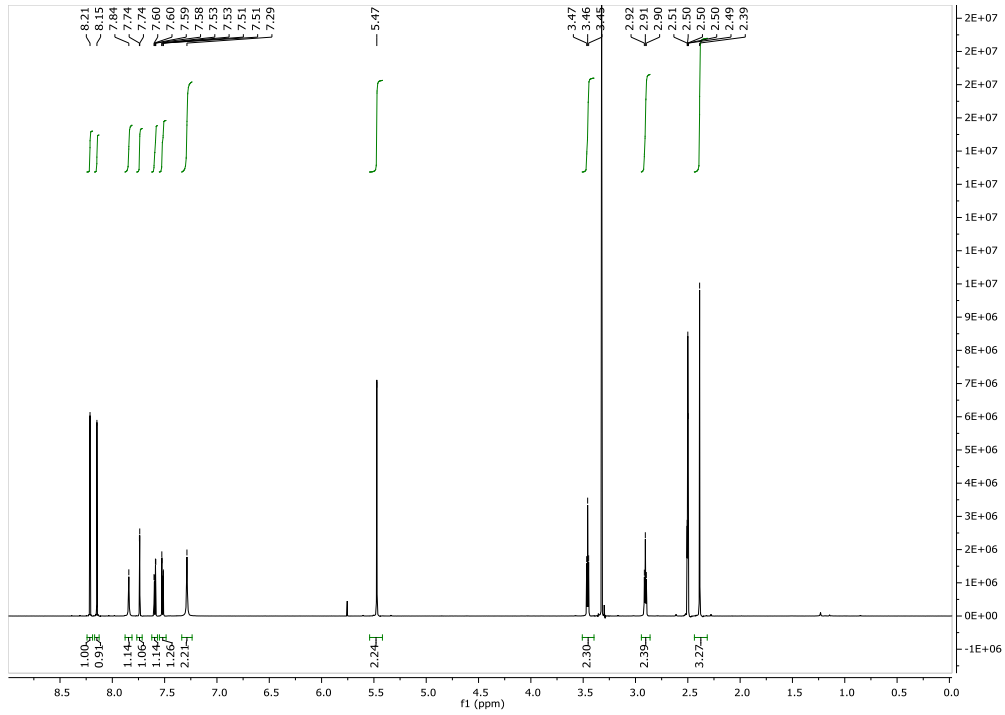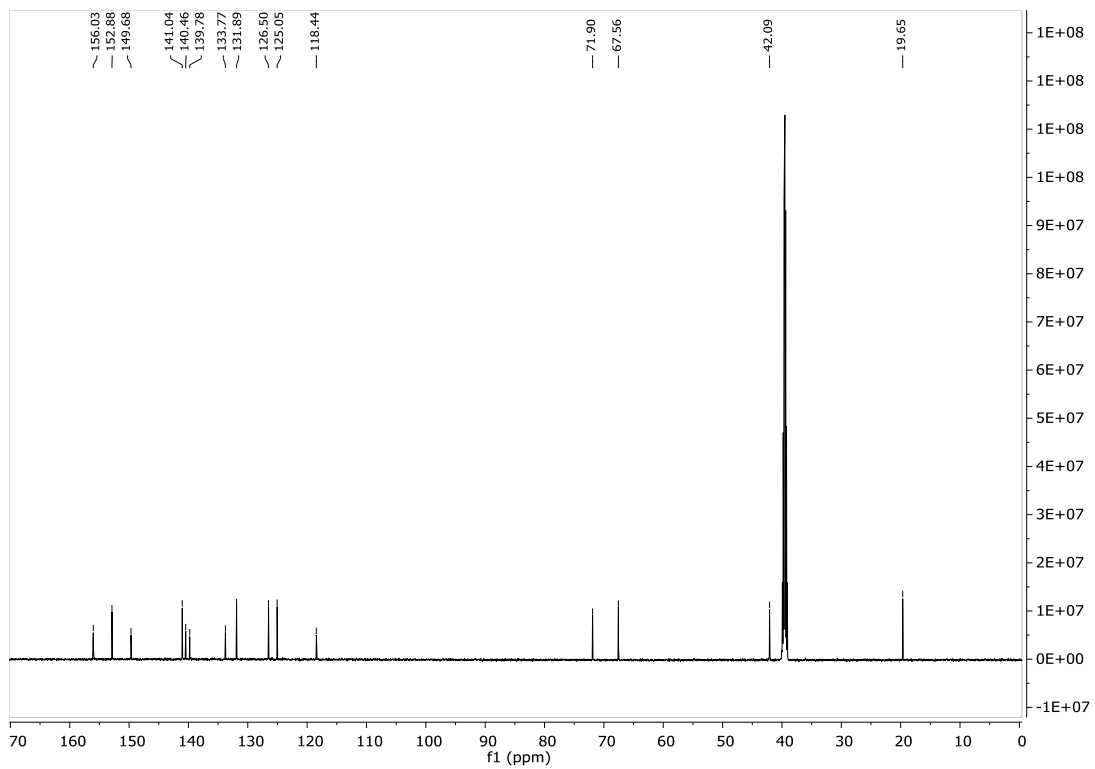

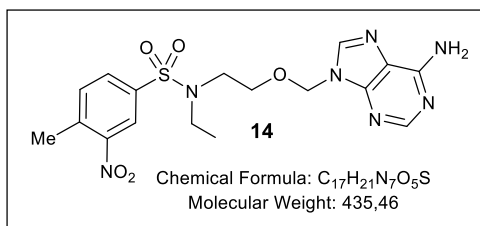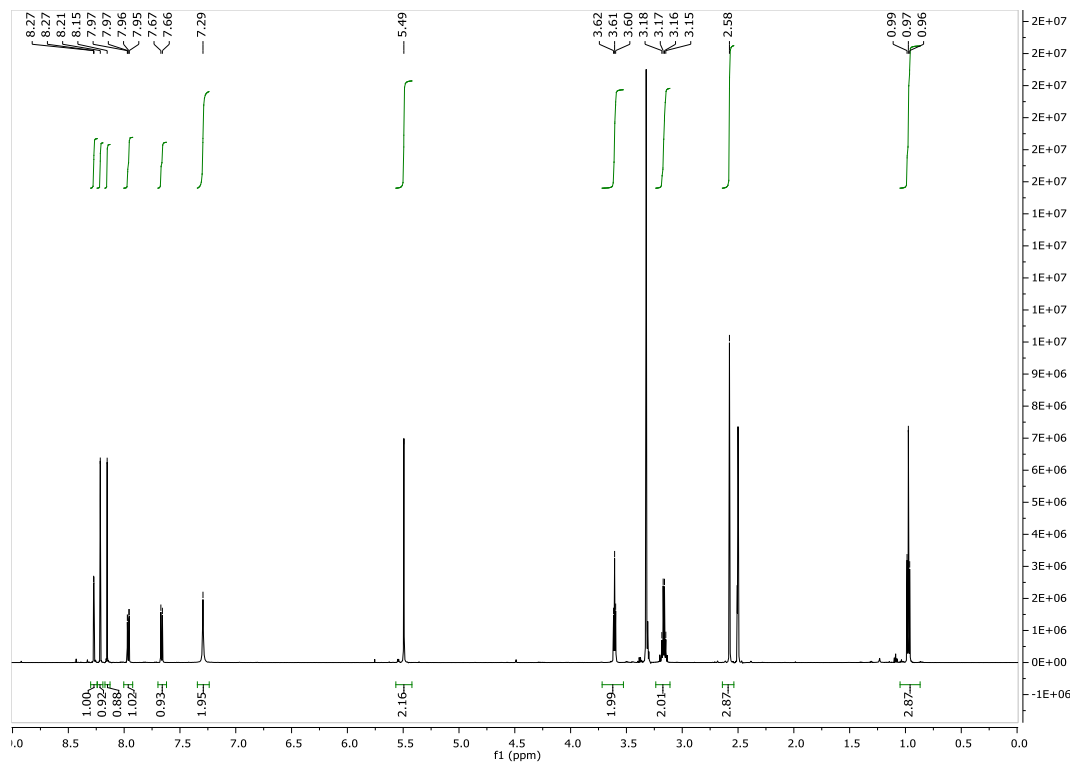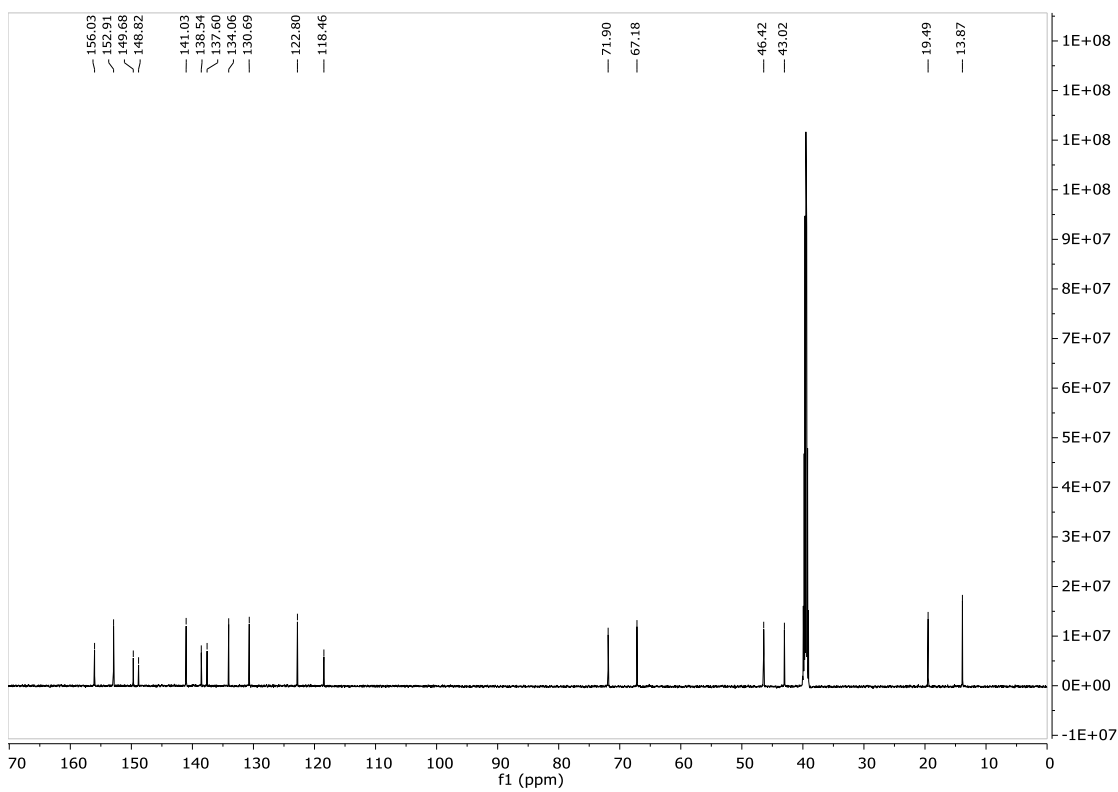

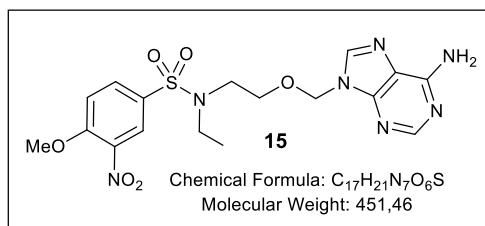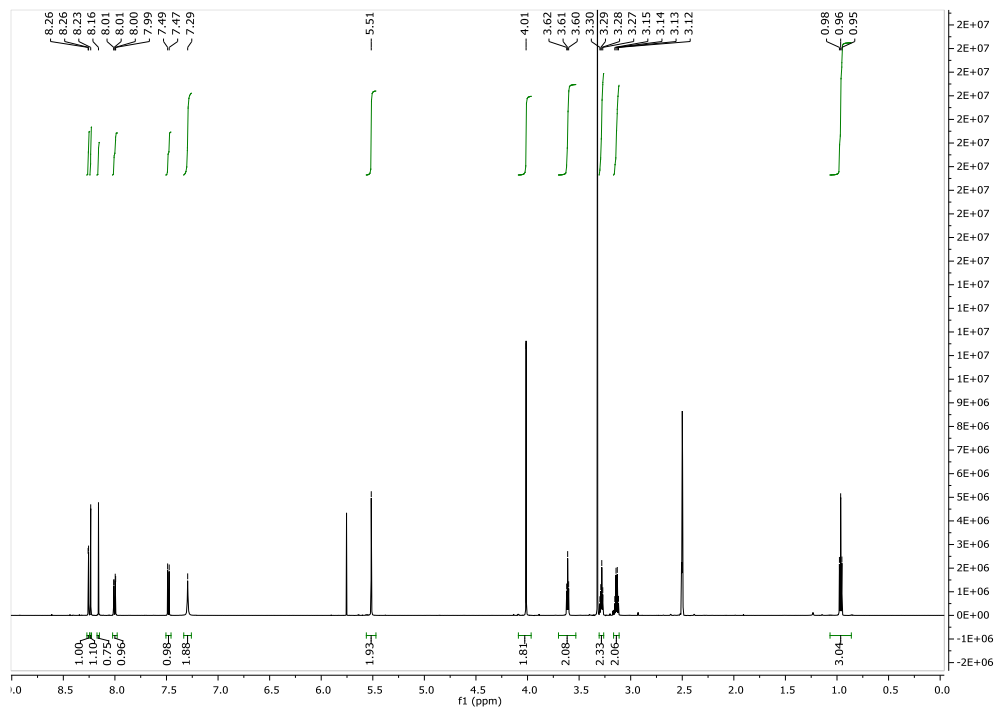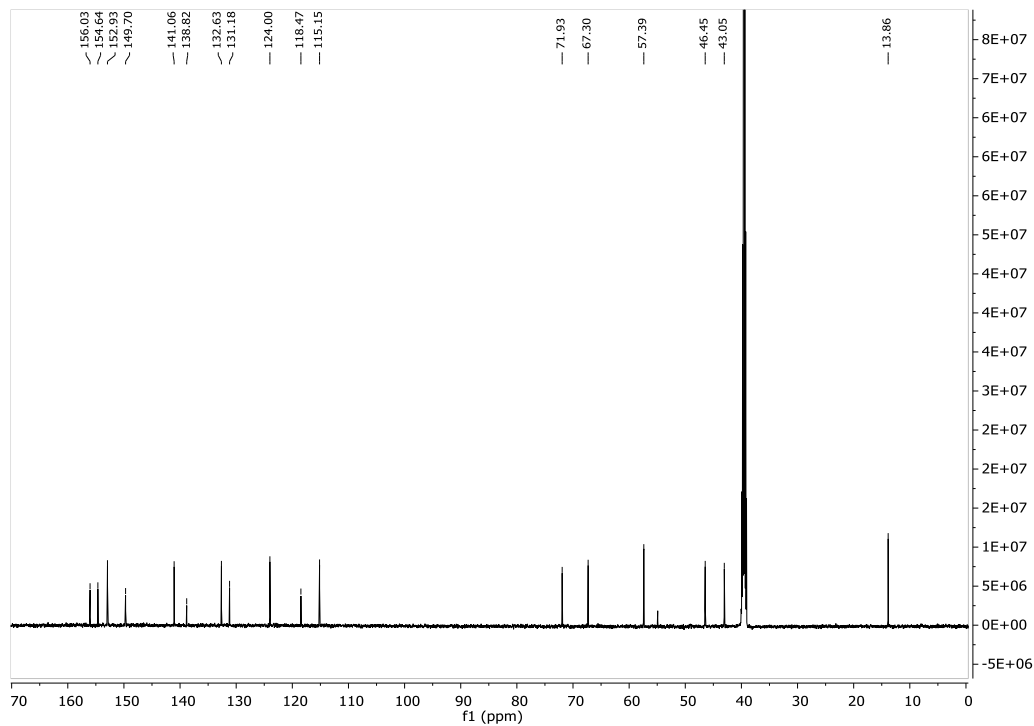

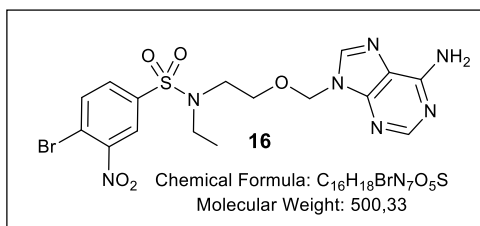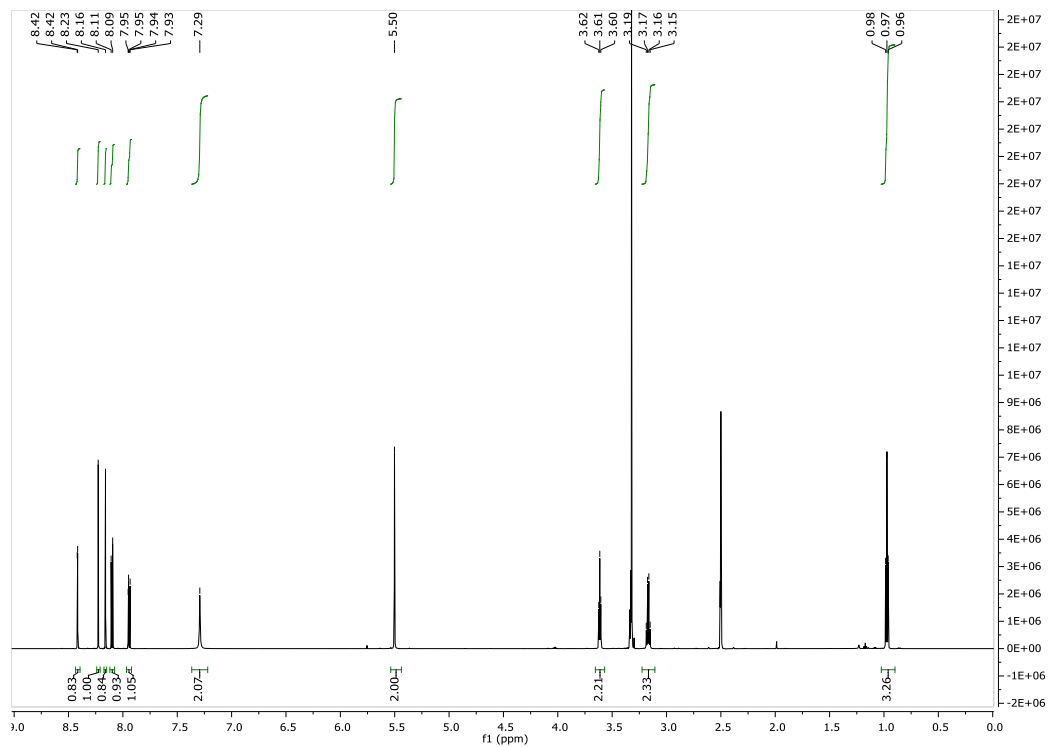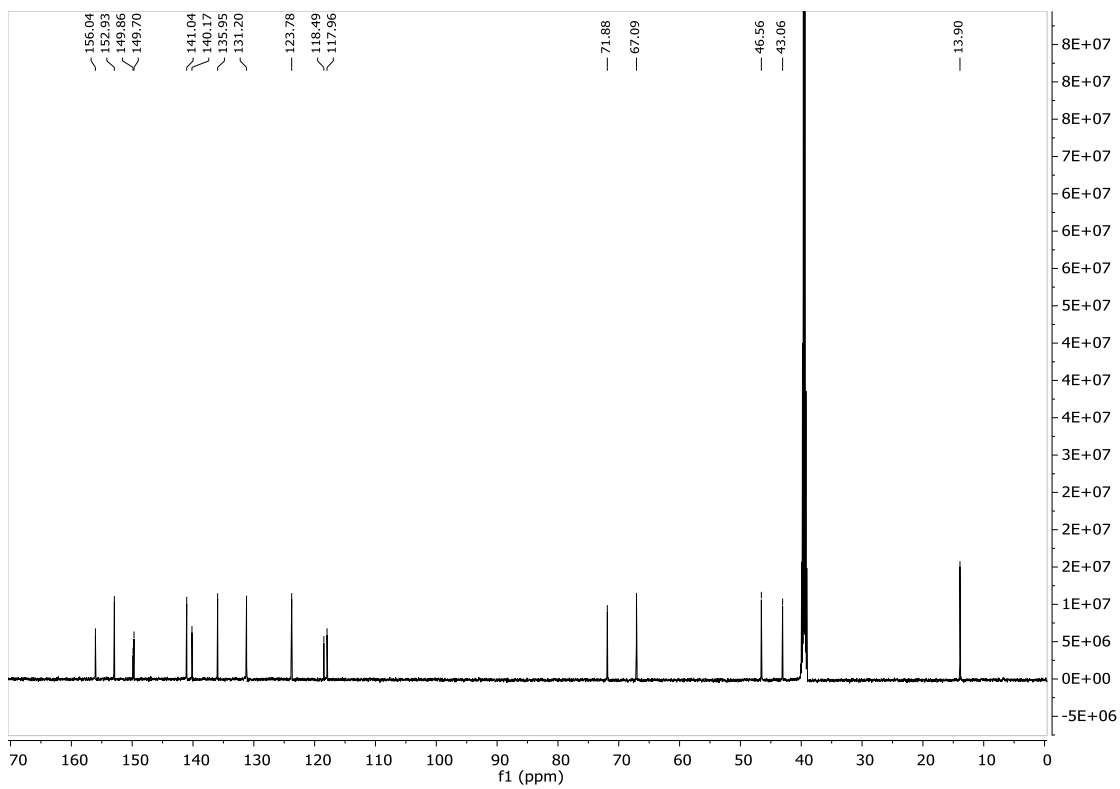



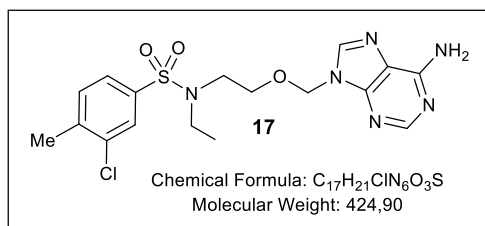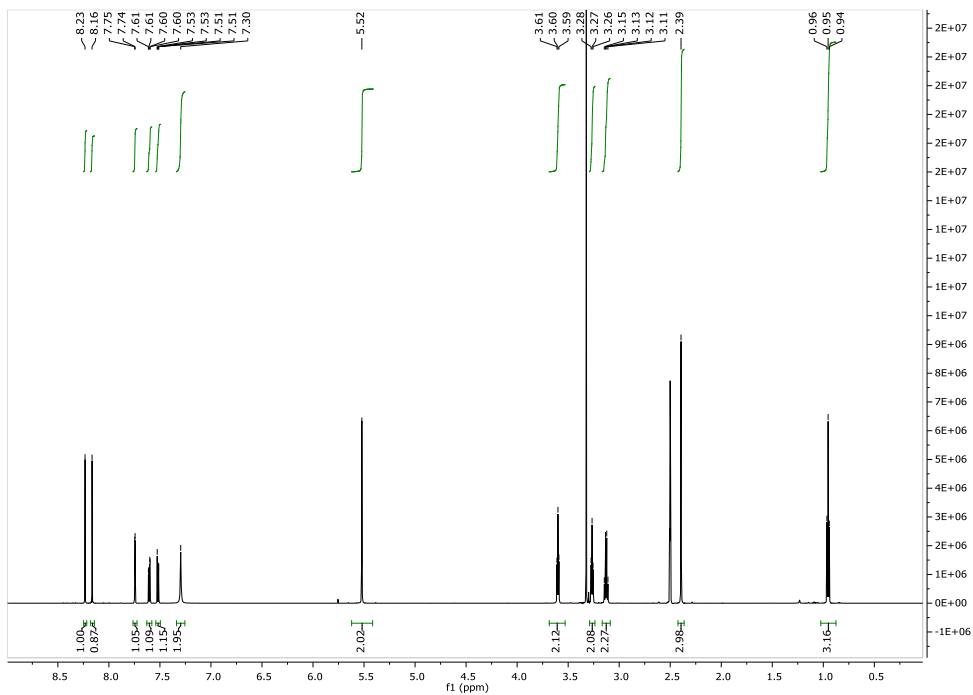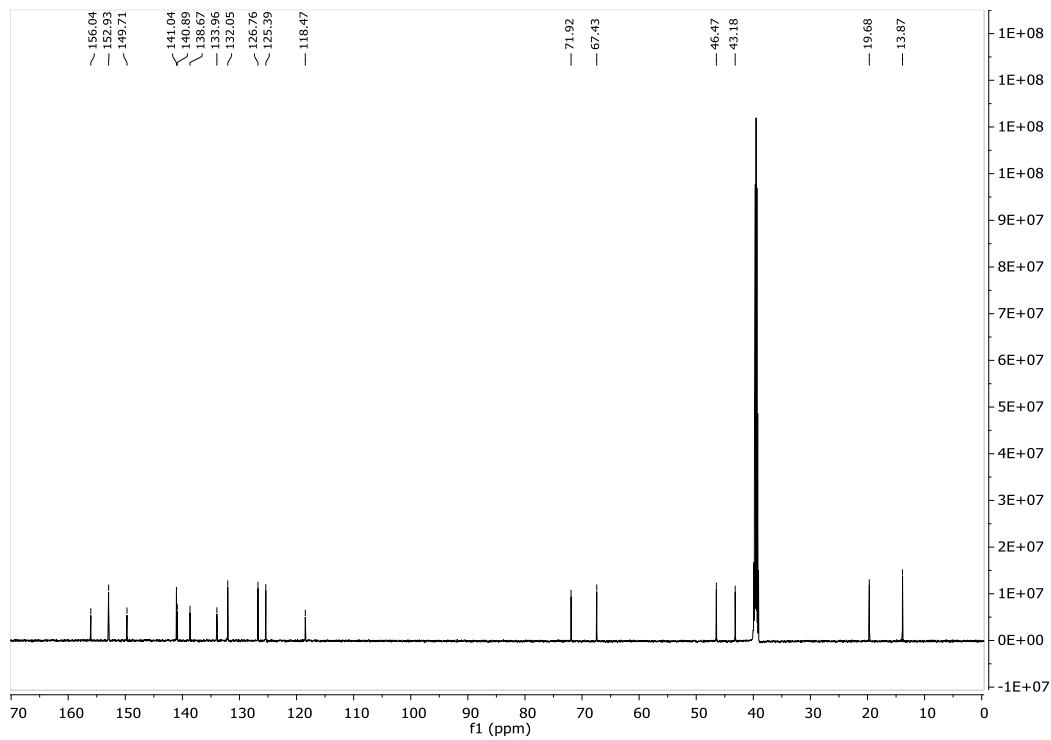

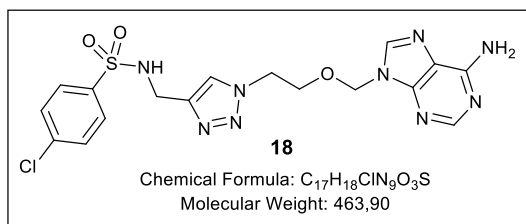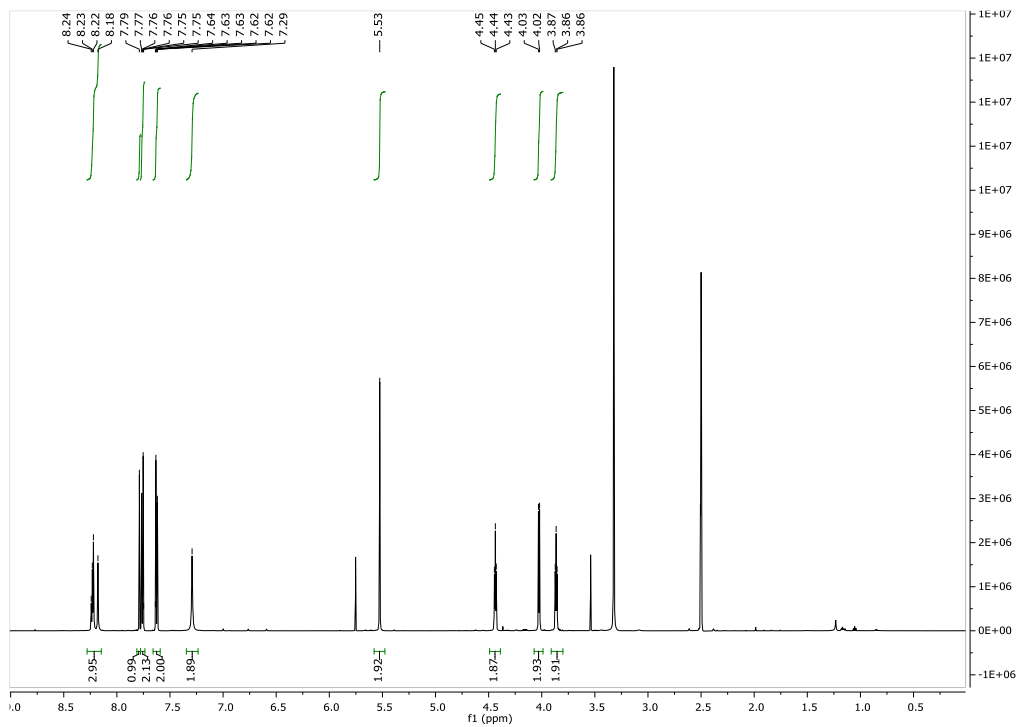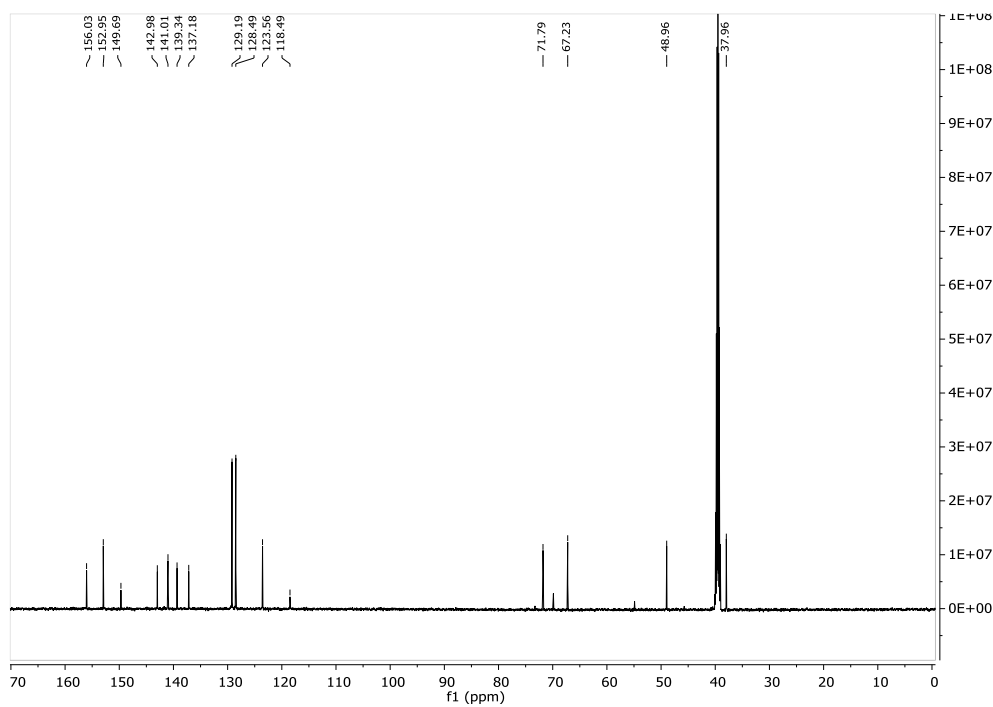

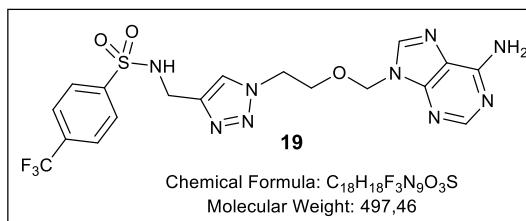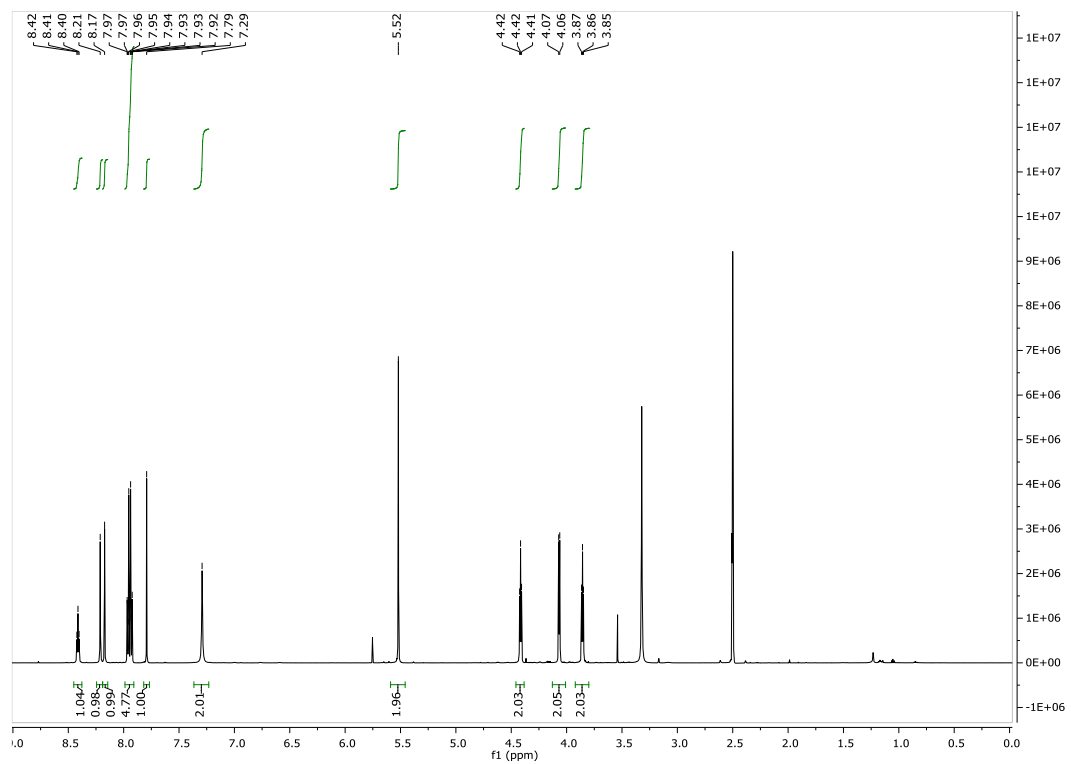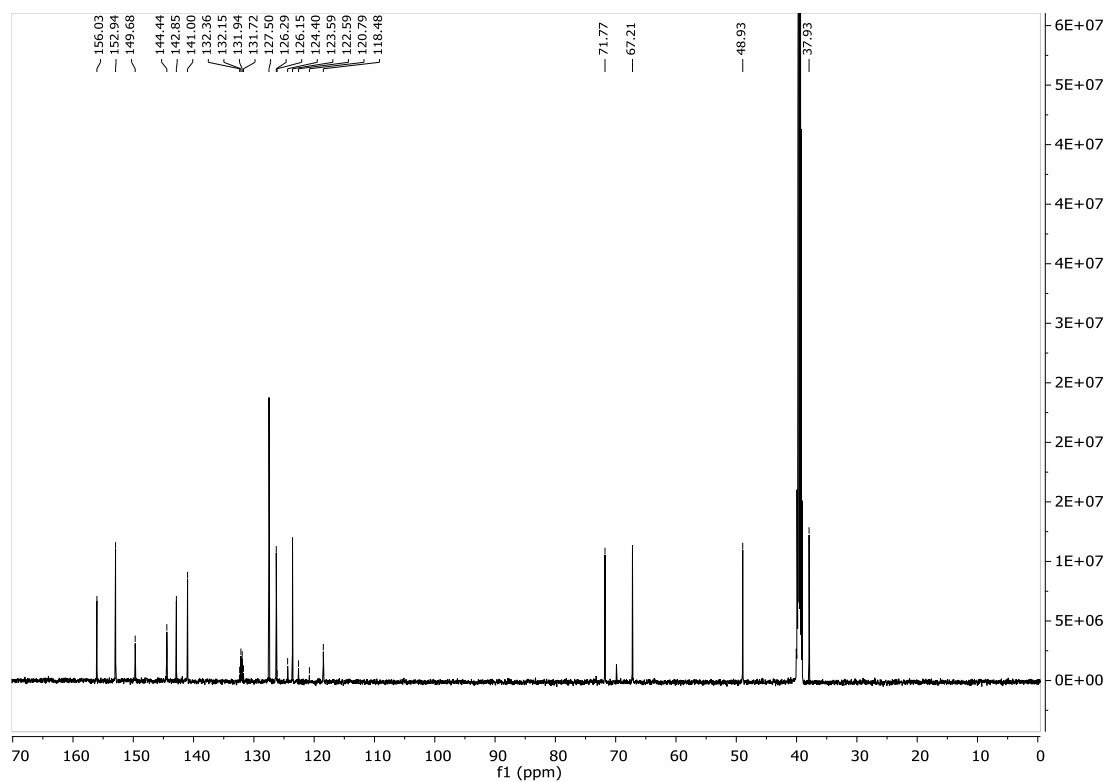

## Expression and purification of recombinant protein

SARS-CoV-2 nsp14 (N7-MTase) coding sequence was cloned in fusion with a N-terminus hexa-histidine tag in pET28 plasmids.<sup>6</sup> The protein was expressed in *E. coli* C2566 and purified in a two-step IMAC using cobalt beads. Briefly, cells were lysed by sonication in a buffer containing 50 mM Tris pH 6.8, 300 mM NaCl, 10 mM imidazole, 5 mM MgCl<sub>2</sub>, and 1 mM BME, supplemented with 0.25 mg/mL lysozyme, 10 µg/mL DNase, and 1 mM PMSF. The protein was next purified through affinity chromatography with HisPur Cobalt resin 480 (Thermo Scientific), washing with an increased concentration of salt (1 M NaCl) and imidazole (20 mM), prior to elution in buffer supplemented with 250 mM imidazole. The second step of purification was performed by size exclusion chromatography (GE Superdex S200) in a final buffer of 50 mM Tris pH 6.8, 300 mM NaCl, 5 mM MgCl<sub>2</sub>, and 1 mM BME and the protein was subsequently concentrated up to 12.5 µM and conserved at -20 °C in a buffer containing 50% of glycerol.

## Determination of the MTase activity by filter binding assay (FBA)

The SARS-CoV-2 nsp14 MTase assay was carried out in reaction mixture [40 mM Tris-HCl (pH 8.0), 1 mM DTT, 1 mM MgCl<sub>2</sub>, 1.9 µM SAM, and 0.1 µM <sup>3</sup>H-SAM (Perkin Elmer)] in the presence of 0.7 µM GpppAC<sub>4</sub> synthetic RNA and the MTase (10 nM).<sup>6</sup> Briefly, the enzyme was first mixed with the compound suspended in 50% DMSO (2.5% final DMSO) before the addition of RNA substrate and <sup>3</sup>H-SAM and then incubated at 30 °C for 60 min. Reactions were stopped by their 10-fold dilution in ice-cold water. Samples were transferred to diethylaminoethyl (DEAE) filtermat (Perkin Elmer) using a Filtermat Harvester (Packard Instruments). The RNA-retaining mats were washed twice with 10 mM ammonium formate pH 8.0, twice with water and once with ethanol. They were soaked with scintillation fluid (Perkin Elmer), and <sup>3</sup>H-methyl transfer to the RNA substrates was determined using a Wallac MicroBeta TriLux liquid scintillation counter (Perkin Elmer).
